# Distribution Analysis of Hydrogenases in Surface Waters of Marine and Freshwater Environments

Martin Barz<sup>1</sup>, Christian Beimgraben<sup>1</sup>, Torsten Staller<sup>2</sup>, Frauke Germer<sup>1</sup>, Friederike Opitz<sup>1</sup>, Claudia Marquardt<sup>1</sup>, Christoph Schwarz<sup>3</sup>, Kirstin Gutekunst<sup>3</sup>, Klaus Heinrich Vanselow<sup>2</sup>, Ruth Schmitz<sup>4</sup>, Julie LaRoche<sup>5</sup>, Rüdiger Schulz<sup>1</sup>, Jens Appel<sup>3\*</sup>

**1** Botanisches Institut, Christian-Albrechts-Universität, Kiel, Germany, **2** Forschungs- und Technologiezentrum Westküste (FTZ) der Christian-Albrechts-Universität, Büsum, Germany, **3** School of Life Sciences, Arizona State University, Tempe, Arizona, United States of America, **4** Institut für Allgemeine Mikrobiologie, Christian-Albrechts-Universität, Kiel, Germany, **5** Leibniz-Institute of Marine Sciences, IFM-GEOMAR, Kiel, Germany

## Abstract

**Background:** Surface waters of aquatic environments have been shown to both evolve and consume hydrogen and the ocean is estimated to be the principal natural source. In some marine habitats, H<sub>2</sub> evolution and uptake are clearly due to biological activity, while contributions of abiotic sources must be considered in others. Until now the only known biological process involved in H<sub>2</sub> metabolism in marine environments is nitrogen fixation.

**Principal Findings:** We analyzed marine and freshwater environments for the presence and distribution of genes of all known hydrogenases, the enzymes involved in biological hydrogen turnover. The total genomes and the available marine metagenome datasets were searched for hydrogenase sequences. Furthermore, we isolated DNA from samples from the North Atlantic, Mediterranean Sea, North Sea, Baltic Sea, and two fresh water lakes and amplified and sequenced part of the gene encoding the bidirectional NAD(P)-linked hydrogenase. In 21% of all marine heterotrophic bacterial genomes from surface waters, one or several hydrogenase genes were found, with the membrane-bound H<sub>2</sub> uptake hydrogenase being the most widespread. A clear bias of hydrogenases to environments with terrestrial influence was found. This is exemplified by the cyanobacterial bidirectional NAD(P)-linked hydrogenase that was found in freshwater and coastal areas but not in the open ocean.

**Significance:** This study shows that hydrogenases are surprisingly abundant in marine environments. Due to its ecological distribution the primary function of the bidirectional NAD(P)-linked hydrogenase seems to be fermentative hydrogen evolution. Moreover, our data suggests that marine surface waters could be an interesting source of oxygen-resistant uptake hydrogenases. The respective genes occur in coastal as well as open ocean habitats and we presume that they are used as additional energy scavenging devices in otherwise nutrient limited environments. The membrane-bound H<sub>2</sub>-evolving hydrogenases might be useful as marker for bacteria living inside of marine snow particles.

**Citation:** Barz M, Beimgraben C, Staller T, Germer F, Opitz F, et al. (2010) Distribution Analysis of Hydrogenases in Surface Waters of Marine and Freshwater Environments. PLoS ONE 5(11): e13846. doi:10.1371/journal.pone.0013846

**Editor:** Francisco Rodriguez-Valera, Universidad Miguel Hernandez, Spain

**Received:** April 7, 2010; **Accepted:** September 17, 2010; **Published:** November 5, 2010

**Copyright:** © 2010 Barz et al. This is an open-access article distributed under the terms of the Creative Commons Attribution License, which permits unrestricted use, distribution, and reproduction in any medium, provided the original author and source are credited.

**Funding:** Financial support was from the Innovationsfond Schleswig-Holstein, Linde AG and from the cluster of excellence "Future Ocean". The funders had no role in study design, data collection and analysis, decision to publish, or preparation of the manuscript.

**Competing Interests:** The authors have declared that no competing interests exist.

\* E-mail: jens.appel@asu.edu

## Introduction

The composition of earth's atmosphere is the result of a number of concurring processes and a matter of continuous change. Especially the amount of trace gases governs important aspects of the gas cover of our planet, such as its retention capacity of heat or the amount of ozone present. After methane, hydrogen is the second most abundant trace gas in the atmosphere, making up around 0.5 ppm to 0.6 ppm [1,2].

Approximately 90% of hydrogen evolution is due to photochemical oxidation of hydrocarbons such as methane in the atmosphere, the combustion of fossil fuels and biomass burning. Natural evolution results from volcanic activity, the nitrogen fixation process in legumes and an uncharacterized source in the oceans. The latter comprises the majority with around 6% (6 Tg per year [3]).

The removal of hydrogen is either due to its reaction with hydroxyl radicals in the atmosphere or by its reaction with hydrogenases in the soil. In particular, hydrogen uptake into the soil is responsible for the largest term with an estimated 75% to 77% globally [1–5]. This is further corroborated by the lower average concentration of hydrogen found on the northern hemisphere, with its larger landmass [1]. Hydrogen uptake was attributed to aerobic hydrogen-oxidizing bacteria and extracellular enzymatic activity. Abiotic removal has been previously considered since hydrogen concentrations are below the threshold level found for cultures of aerobic hydrogen oxidizing bacteria that still maintains growth [6].

In contrast to soil, supersaturating concentrations of hydrogen have been measured in aquatic environments. In all cases, concentrations were highest at the surface and steeply decreased

down to the thermocline while the deep ocean is undersaturated. Although a systematic analysis is not available it appears that surface waters of tropical and subtropical oceans are generally hydrogen sources [7–9]. In contrast, concentrations lower than the expected atmospheric equilibrium have been observed in higher latitudes and both hydrogen uptake and production vary depending on the season [10,11]. In some fresh water lakes supersaturation has also been found [12], with a maximum at dawn [13]. The highest hydrogen concentrations were in the upper water column, which correlated with the maximum of primary production [13,14].

Marine hydrogen uptake has been attributed to particulate fractions of 0.2  $\mu\text{m}$  to 5  $\mu\text{m}$  in size [11] and, like in freshwater lakes, most probably correlates with aerobic hydrogen-oxidizing bacteria [13]. Hydrogen production in the oceans was found to depend on solar radiation and clearly shows a diurnal variation with a maximum around noon [8,9]. Since the nitrogenase inevitably produces at least one molecule of hydrogen per dinitrogen reduced to ammonia, cyanobacterial nitrogen fixation is thought to be the major source of hydrogen in these oceanic regions. Studies on heterocystous cyanobacteria demonstrated that hydrogen cycling by these strains is highly effective, although under  $\text{CO}_2$ -limitation around  $0.1 \text{ nmol H}_2 \text{ h}^{-1} (\text{mg chlorophyll})^{-1}$  escapes to the environment [15]. In contrast to this, in-situ measurements of *Trichodesmium thiebautii* (former *Oscillatoria thiebautii*), which is one of the major oceanic N-fixing strains, questioned whether its hydrogen evolution is actually sufficient to explain the concentrations found [16].

Recently it was shown that photochemical production of hydrogen from chromogenic dissolved organic matter can contribute, at least in part, to hydrogen production in fresh water lakes as well as coastal seawater [17]. Therefore, abiotic sources should be taken into account.

In the microbial world hydrogen is a valuable energy source that is exchanged efficiently between different prokaryotes and anaerobic eukaryotes. Some produce hydrogen while fermenting whereas others capture it to drive anaerobic or aerobic respiration and make use of its energy. A wealth of different enzymes called hydrogenases have been found in microorganisms that are able to split or form hydrogen [18,19].

Hydrogenases are classified according to their metal content into the Fe-, FeFe-, and NiFe-varieties. Fe-hydrogenases are confined to the methanogenic archaea and FeFe-hydrogenases occur in bacteria and anaerobic eukaryotes. NiFe-hydrogenases are separated into 4 different groups and are widespread in archaea and bacteria [19,20]. Most purified hydrogenases are only active under anoxic conditions, but there are some NiFe-hydrogenases from aerobic  $\text{H}_2$ -oxidizing bacteria that are able to oxidize hydrogen at ambient oxygen concentrations [21].

Although hydrogenases have been investigated for a long time in a variety of different microorganisms it is rather difficult to deduce their physiological function on the basis of their classification alone. In Table 1 a tentative assignment of their metabolic roles is given. However, this assignment needs to be treated cautiously since several studies found surprising variations. Hydrogenase 2 of *E. coli* belongs to the group 1  $\text{H}_2$ -uptake hydrogenases and was originally described as  $\text{H}_2$ -oxidizing enzyme [22]. In contrast, recent electrochemical data suggests that the hydrogenase 2 is working as a bidirectional enzyme [23]. Another interesting variance was found in case of the group 4 membrane-bound  $\text{H}_2$ -evolving hydrogenase. In many cases these enzymes seem to be used under fermentative conditions to generate a proton gradient (e.g. [24]) but in other cases they might be used to oxidize  $\text{H}_2$  and reduce ferredoxin with the concomitant use of a proton gradient [25] or even for  $\text{H}_2$  uptake in N-fixing bacteria [26].

**Table 1.** Overview of all the known hydrogenase enzymes.

| Group                    | Name                                               | Tentative function                                                                                                                                                                                                                                                          | $\text{O}_2$ resistance                                        |
|--------------------------|----------------------------------------------------|-----------------------------------------------------------------------------------------------------------------------------------------------------------------------------------------------------------------------------------------------------------------------------|----------------------------------------------------------------|
| <b>Fe-hydrogenase</b>    |                                                    |                                                                                                                                                                                                                                                                             |                                                                |
| One Group                | Hmd hydrogenase                                    | Occurs only in methanogens and is used for $\text{H}_2$ -uptake during methanogenesis                                                                                                                                                                                       | its cofactor is sensitive against oxygen                       |
| <b>FeFe-hydrogenases</b> |                                                    |                                                                                                                                                                                                                                                                             |                                                                |
| No groups assigned yet   | Periplasmic and cytoplasmic enzymes                | Periplasmic enzymes are probably $\text{H}_2$ -oxidizing whereas cytoplasmic enzymes are $\text{H}_2$ -evolving                                                                                                                                                             | No resistant enzymes known, rapid inactivation by $\text{O}_2$ |
| <b>NiFe-hydrogenases</b> |                                                    |                                                                                                                                                                                                                                                                             |                                                                |
| 1                        | Membrane-bound $\text{H}_2$ -uptake hydrogenases   | $\text{H}_2$ uptake under anaerobic and aerobic conditions                                                                                                                                                                                                                  | Some resistant enzymes known                                   |
| 2a                       | Cyanobacterial uptake hydrogenases                 | $\text{H}_2$ uptake under $\text{N}_2$ -fixing conditions                                                                                                                                                                                                                   | No resistant enzymes known                                     |
| 2b                       | $\text{H}_2$ -sensing hydrogenases                 | $\text{H}_2$ receptor that activates the expression of hydrogenase structural genes                                                                                                                                                                                         | Resistant                                                      |
| 3a                       | $\text{F}_{420}$ -reducing hydrogenases            | $\text{H}_2$ uptake during methanogenesis                                                                                                                                                                                                                                   | No resistant enzymes known                                     |
| 3b                       | Bifunctional NAD(P) hydrogenases                   | Function unknown                                                                                                                                                                                                                                                            | No resistant enzymes known                                     |
| 3c                       | Methyl-viologen-reducing hydrogenases              | $\text{H}_2$ uptake during methanogenesis                                                                                                                                                                                                                                   | No resistant enzymes known                                     |
| 3d                       | Bidirectional NAD(P)-linked hydrogenases           | $\text{H}_2$ uptake for the generation of NAD(P)H or $\text{H}_2$ evolution                                                                                                                                                                                                 | Some resistant enzymes known                                   |
| 4                        | Membrane-bound $\text{H}_2$ -evolving hydrogenases | $\text{H}_2$ evolution under fermentative conditions in some bacteria and $\text{H}_2$ uptake for the reduction of ferredoxin in others, both processes are either accompanied by a proton gradient formation or the use of a proton gradient for reverse electron transfer | No resistant enzymes known                                     |

For all the different classes [19,20] a tentative function is given.  
doi:10.1371/journal.pone.0013846.t001

Systematic studies concerning the distribution of hydrogenases in different habitats to unravel their ecophysiological role are not yet available. Apart from the investigation of some specific soil hydrogenases [27,28] only two studies attempted the amplification of FeFe-hydrogenase sequences from microbial mats [29,30]. Although these works showed a surprising variety of these hydrogenases the short sequences amplified preclude any assignment of their function.

The hydrogen concentrations found in a variety of surface waters prompted us to investigate the presence and distribution of all known hydrogenases in marine and freshwater environments. Moreover, the ecological distribution of their genes was analyzed to collect valuable hints for their physiological functions and their oxygen tolerance.

To this end we analyzed the distribution of hydrogenases in cyanobacteria since they are one of the largest prokaryotic groups that occur in aquatic surface waters. The search was then expanded to the complete genomes of bacteria isolated from marine surface waters ([http://www.ncbi.nlm.nih.gov/sutils/genom\\_table.cgi](http://www.ncbi.nlm.nih.gov/sutils/genom_table.cgi) [31]) and the global ocean sampling metagenomic database (<http://camera.calit2.net/>)[32–34] for all the families of hydrogenases as classified by Vignais et al. [20] and Vignais and Billoud [19]. In parallel, we investigated DNA isolated from samples taken from the North Atlantic, Mediterranean Sea, North Sea, the Baltic Sea and the fresh water lakes Westensee and Selenter See in Northern Germany for the presence of the genes of the bidirectional NAD(P)-linked hydrogenase. Our results reveal that these enzymes are surprisingly widespread in surface waters and a clear bias toward waters with terrestrial influence is obvious.

## Results

### Distribution of hydrogenases in cyanobacterial genomes

Cyanobacteria are known to harbor two different NiFe-hydrogenases. One is called bidirectional (group 3d) since it can produce or take up hydrogen, depending on the physiological conditions and the other is an uptake hydrogenase (group 2a) that is linked to the nitrogen fixation process and seems to be confined to diazotrophic strains [35,36]. A phylogenetic analysis revealed a close ancestry of both hydrogenases to the filamentous anoxygenic photosynthetic bacteria (the former green non-sulfur bacteria)[37].

A search of genebank (<http://www.ncbi.nlm.nih.gov/>) and cyanobase (<http://bacteria.kazusa.or.jp/cyanobase/>) for all available cyanobacterial sequences revealed the presence of the bidirectional NAD(P)-linked hydrogenase (the large subunit HoxH was used in the BLAST search [38]) in all the freshwater strains and all the strains isolated from microbial mats, salt marshes, and the intertidal zone (Table 2). In contrast, only four out of the seven available coastal genomes harbor the gene for the bidirectional enzyme and it was completely absent in oceanic strains. Genomestreamlining and iron limitation [39] in the open ocean could be used as arguments for the absence of the bidirectional hydrogenase genes in the picoplanktonic *Prochlorococcus* and *Synechococcus* strains. But even the typical open ocean strains *Crocospira watsonii* and *Trichodesmium erythraeum* with genome sizes above 6 Mbp do not harbor this hydrogenase, although both have the uptake hydrogenase, which has an iron requirement similar to the bidirectional enzyme (Fig. 1 and Table 2). In addition the unicellular marine strain UCYN-A that lacks photosystem II shows an extremely reduced genome and still contains the *hup*-genes [40].

All the completely sequenced cyanobacterial strains that harbor the bidirectional hydrogenase genes also harbor the gene of a

pyruvate:flavodoxin/ferredoxin oxidoreductase (PFOR), *nifH*. In two genomes (*Synechococcus* WH 5701 and *Arthrospira maxima*), this gene is either part of the *hup*-gene cluster or in close proximity to the *hox*-genes, suggesting that the bidirectional hydrogenase is used to dispose of electrons during fermentation via a PFOR-like enzyme (Table 2).

The occurrence of the uptake hydrogenase (HupL, group 2a) in cyanobacteria does not correlate with a specific habitat but with the diazotrophy of the respective strains, as indicated by the presence of the nitrogenase genes (e.g. NifD)(Table 2). Of the completely sequenced genomes two *Synechococcus* strains isolated from a hot spring and *Cyanothece* sp. PCC 7425 harbor the nitrogenase genes but no uptake hydrogenase. This confirms the previous finding of a marine nitrogen-fixing *Synechococcus* strain without an uptake hydrogenase [37].

*Cyanothece* sp. PCC 7425 is the only strain containing the genes of the bifunctional NAD(P) linked hydrogenase (group 3b)(Table 2) but expression and metabolic activity of this enzyme have not yet been demonstrated.

### Distribution of hydrogenases in genomes of heterotrophic bacteria isolated from marine surface waters

Representatives of each of the hydrogenase classes were used to search the completely sequenced prokaryotic genomes in the genebank (Table 3). Of the approximately 1210 prokaryotic genomes (as of March 2010) 149 were isolated from marine surface waters and in 33 of these genomes, one or several hydrogenases occur, making up 22% of the total (Table 4, Table S1 supporting information). Since a number of the analyzed genomes is still not complete, this proportion is a minimum estimate. If divided into coastal and open ocean isolates, 25% of the coastal and 14% of the open ocean strains have hydrogenase genes.

The genomes of two *Shewanella* strains (ANA-3 and MR-4) have all the genes necessary for the expression of a FeFe-hydrogenase. Since this type of hydrogenase is extremely sensitive against and irreversibly inactivated by oxygen [41], this is a surprising finding. However, it should be noted that one strain (ANA-3) has been isolated from a wooden pier that might have been occupied by biofilms that could become anaerobic and the other strain (MR-4) was isolated from the Black Sea, which is the world largest anoxic basin [42]. Therefore, both are considered exceptions and will not be discussed any further.

Concerning the NiFe-hydrogenases, there are 24 genomes with a membrane-bound H<sub>2</sub>-uptake hydrogenase (group 1), two genomes with a cyanobacterial-type uptake hydrogenase (group 2a)(*Sphingopyxis alaskensis* RB2256 and *Neptuniibacter caesariensis*), six genomes with a sensor hydrogenase (group 2b), seven genomes with a bifunctional hydrogenase (group 3b), four genomes with a bidirectional NAD(P)-linked hydrogenase (group 3d), and three genomes with a membrane-bound H<sub>2</sub>-evolving hydrogenase (group 4) similar to hydrogenase 3 of *E. coli*.

The genomes of the *Roseovarius* group contain large gene clusters with the membrane-bound hydrogenase in conjunction with a sensor hydrogenase and the whole complement of the two-component system (Fig. S1, supporting information). The sensor enzyme is a receptor that enables the cells to detect hydrogen in the environment and to activate transcription of the hydrogenase structural genes [43–46]. The same gene clusters also contain a number of additional genes that encode for proteins such as HupK that have been shown to be necessary for the production of an oxygen tolerant hydrogenase in *R. eutropha* [47,48].

**Table 2.** Occurrence of the bidirectional NAD(P)-linked hydrogenase (HoxH) and the membrane-bound uptake hydrogenase (HupL) in cyanobacteria.

| Strain                                       | Environment          | size | HoxH <sup>a</sup> | NifJ                         | HupL         | NifD                  |
|----------------------------------------------|----------------------|------|-------------------|------------------------------|--------------|-----------------------|
| <i>Anabaena variabilis</i> ATCC 29413        | freshwater           | 6.36 | YP_325153         | YP_323551<br>YP_321599       | YP_325087    | YP_324742             |
| <i>Arthrospira maxima</i> CS-328             | freshwater           | 6.0  | ZP_03273562       | ZP_03273569                  |              |                       |
| <i>Cylindrospermopsis raciborskii</i> CS-505 | freshwater           |      | ZP_06307638       | ZP_06307770<br>ZP_06309351   | ZP_06309263  | ZP_06309411           |
| <i>Gloeocapsa alpicola</i> str. CALU 743     | freshwater           |      | AAO85440          |                              |              |                       |
| <i>Microcystis aeruginosa</i> NIES-843       | freshwater           | 5.84 | YP_001656435      | YP_001658828                 |              |                       |
| <i>Microcystis aeruginosa</i> PCC 7806       | freshwater           | 5.17 | CAO89286          | CAO88863                     |              |                       |
| <i>Nostoc</i> sp. PCC 7120                   | freshwater           | 6.41 | NP_484809         | NP_485951<br>NP_486843       | NP_484720    | NP_485484             |
| <i>Prochlorothrix hollandica</i>             | freshwater           |      | U88400            |                              |              |                       |
| <i>Raphidiopsis brookii</i> D9               | freshwater           |      | ZP_06303751       | ZP_06305273                  |              |                       |
| <i>Synechococcus elongatus</i> PCC 6301      | freshwater           | 2.69 | YP_172265         | YP_172431                    |              |                       |
| <i>Synechococcus elongatus</i> PCC 7942      | freshwater           | 2.69 | YP_401572         | YP_401401                    |              |                       |
| <i>Synechocystis</i> sp. PCC 6803            | freshwater           | 3.57 | NP_441411         | NP_442703                    |              |                       |
| <i>Anabaena siamensis</i> TISTR 8012         | rice field           |      | AAN65267          |                              | AAN65266     | ABA02237              |
| <i>Cyanothece</i> sp. PCC 7424               | rice field           | 5.94 | ZP_02972728       | YP_002376576                 | ZP_02973433  | YP_002377414          |
| <i>Cyanothece</i> sp. PCC 7425 <sup>b</sup>  | rice field           | 5.37 | YP_002484718      | YP_002485040                 |              | ZP_03139427           |
| <i>Cyanothece</i> sp. PCC 7822               | rice field           | 5.7  | ZP_03154336       | ZP_03157112                  | ZP_03153783  | ZP_03154128           |
| <i>Cyanothece</i> sp. PCC 8801               | rice field           | 4.68 | ZP_02942892       | YP_002374020                 | ZP_02941033  | ZP_02943179           |
| <i>Cyanothece</i> sp. PCC 8802               | rice field           | 4.8  | ZP_03143669       | ZP_03141892                  | ZP_03142797  | ZP_03144923           |
| <i>Arthrospira maxima</i> FACHBSM            | saline marsh         |      | AAQ63961          |                              |              |                       |
| <i>Arthrospira platensis</i> FACHB341        | saline marsh         |      | AAQ63964          |                              |              |                       |
| <i>Arthrospira platensis</i> FACHB439        | saline marsh         |      | AAQ63960          |                              |              |                       |
| <i>Arthrospira platensis</i> FACHB440        | saline marsh         |      | AAQ63963          |                              |              |                       |
| <i>Arthrospira platensis</i> FACHB791        | saline marsh         |      | AAQ91344          |                              |              |                       |
| <i>Arthrospira platensis</i> FACHBOUQD56     | saline marsh         |      | AAQ63959          |                              |              |                       |
| <i>Microcoleus chthonoplastes</i> PCC 7420   | saline marsh         | 8.67 | YP_002619903      | YP_002620835                 |              | ZP_05024116           |
| <i>Lyngbya aestuarii</i> CCY 9616            | marine microbial mat | 7.0  | ABD34839          |                              | ABD34838     | ABD34836 <sup>c</sup> |
| <i>Lyngbya majuscula</i> CCAP 1446/4         | marine microbial mat |      | AY536043          |                              | AAO66476     | AAV78884              |
| <i>Lyngbya</i> sp. PCC 8106                  | marine microbial mat | 7.0  | ZP_01622077       | ZP_01622083                  | ZP_01619041  | ZP_01620767           |
| <i>Cyanobium</i> sp. PCC 7001                | intertidal zone      | 2.8  | YP_002597857      | YP_002597848                 |              |                       |
| <i>Cyanothece</i> sp. ATCC 51142             | intertidal zone      | 4.93 | YP_001803731      | YP_001802370                 | YP_001802481 | YP_001801977          |
| <i>Synechococcus</i> sp. PCC 7002            | intertidal zone      | 3.00 | YP_001733469      | YP_001734690                 |              |                       |
| <i>Synechococcus</i> sp. PCC 7335            | intertidal zone      | 6.0  | YP_002710310      | YP_002711016<br>YP_002710302 |              | YP_002711054          |
| <i>Cyanothece</i> sp. CCY 0110               | coastal              | 5.9  | ZP_01727423       | ZP_01730229                  | ZP_01728928  | ZP_01727766           |
| <i>Nodularia spumigena</i> CCY 9414          | coastal              | 5.3  | ZP_01629499       | ZP_01630855                  | ZP_01628406  | ZP_01628430           |
| <i>Spirulina subsalsa</i> FACHB351           | coastal              |      | AY345592          |                              |              |                       |
| <i>Synechococcus</i> sp. CC9605              | coastal              | 2.51 |                   |                              |              |                       |
| <i>Synechococcus</i> sp. CC9902              | coastal              | 2.23 |                   |                              |              |                       |
| <i>Synechococcus</i> sp. BL107               | coastal              | 2.3  |                   |                              |              |                       |
| <i>Synechococcus</i> sp. WH 5701             | coastal              | 3.0  | ZP_01085930       | ZP_01085923                  |              |                       |
| <i>Crocospaera watsonii</i> WH 8501          | open ocean           | 6.24 |                   | ZP_00518015                  | ZP_00519188  | ZP_00516387           |
| <i>Prochlorococcus marinus</i> str. AS9601   | open ocean           | 1.67 |                   |                              |              |                       |
| <i>Prochlorococcus marinus</i> str. MIT 9211 | open ocean           | 1.69 |                   |                              |              |                       |
| <i>Prochlorococcus marinus</i> str. MIT 9215 | open ocean           | 1.74 |                   |                              |              |                       |
| <i>Prochlorococcus marinus</i> str. MIT 9301 | open ocean           | 1.64 |                   |                              |              |                       |

Table 2. Cont.

| Strain                                                              | Environment              | size | HoxH <sup>a</sup> | NifJ         | HupL         | NifD         |
|---------------------------------------------------------------------|--------------------------|------|-------------------|--------------|--------------|--------------|
| <i>Prochlorococcus marinus</i> str. MIT 9303                        | open ocean               | 2.68 |                   |              |              |              |
| <i>Prochlorococcus marinus</i> str. MIT 9312                        | open ocean               | 1.70 |                   |              |              |              |
| <i>Prochlorococcus marinus</i> str. MIT 9313                        | open ocean               | 2.41 |                   |              |              |              |
| <i>Prochlorococcus marinus</i> str. MIT 9515                        | open ocean               | 1.70 |                   |              |              |              |
| <i>Prochlorococcus marinus</i> str. NATL1A                          | open ocean               | 1.86 |                   |              |              |              |
| <i>Prochlorococcus marinus</i> str. NATL2A                          | open ocean               | 1.84 |                   |              |              |              |
| <i>Prochlorococcus marinus</i> subsp. <i>marinus</i> str. CCMP1375  | open ocean               | 1.75 |                   |              |              |              |
| <i>Prochlorococcus marinus</i> subsp. <i>pastoris</i> str. CCMP1986 | open ocean               | 1.75 |                   |              |              |              |
| <i>Synechococcus</i> sp. CC9311                                     | open ocean               | 2.61 |                   |              |              |              |
| <i>Synechococcus</i> sp. WH 7803                                    | open ocean               | 2.37 |                   |              |              |              |
| <i>Synechococcus</i> sp. WH 7805                                    | open ocean               | 2.6  |                   |              |              |              |
| <i>Synechococcus</i> sp. WH 8102                                    | open ocean               | 2.43 |                   |              |              |              |
| <i>Trichodesmium erythraeum</i> MS101                               | open ocean               | 7.75 |                   |              | YP_722943    | YP_723618    |
| Cyanobacterium UCYN-A                                               | open ocean               | 1.44 |                   |              | YP_003421184 | YP_003421697 |
| <i>Synechococcus</i> sp. RCC307                                     | Mediterranean Sea        | 2.22 |                   |              |              |              |
| <i>Synechococcus</i> sp. RS9916                                     | Red Sea                  | 2.7  |                   |              |              |              |
| <i>Synechococcus</i> sp. RS9917                                     | Red Sea                  | 2.6  |                   |              |              |              |
| <i>Synechococcus</i> sp. JA-2-3B'a(2-13)                            | hot spring               | 3.04 |                   |              |              | YP_476681    |
| <i>Synechococcus</i> sp. JA-3-3Ab                                   | hot spring               | 2.93 |                   |              |              | YP_475237    |
| <i>Thermosynechococcus elongatus</i> BP-1                           | hot spring               | 2.59 |                   |              |              |              |
| <i>Acaryochloris marina</i>                                         | ascidian                 | 6.50 | YP_001521996      | YP_001522063 |              |              |
| <i>Arthrospira platensis</i> str. Paraca                            | Salt lake                |      | ZP_06307638       | ZP_06381891  |              |              |
| <i>Gloeobacter violaceus</i> sp. PCC 7421                           | rock                     | 4.66 |                   |              |              |              |
| <i>Nostoc azollae</i>                                               | Symbiont with water fern |      | ZP_03765204       |              | ZP_03768004  | ZP_03768758  |
| <i>Nostoc punctiforme</i> sp. PCC 73102                             | symbiont with cycad      | 8.23 |                   | YP_001867453 | ZP_00112356  | ZP_00112319  |
| <i>Nostoc</i> sp. PCC 7422                                          | symbiont with cycad      | ~10  | BAE46796          |              | BAE46791     |              |

<sup>a</sup>the genomes have been searched by using the respective protein sequences.

<sup>b</sup>Cyanothecae sp. PCC 7425 is the only cyanobacterium with the gene of a bifunctional (NADP) hydrogenase (YP\_002483374).

The 69 strains have been separated according to the habitat they have been isolated from. *Leptolyngbya valderiana* BDU 20041 has been omitted from the analysis although it is provided in the genebank ([http://www.ncbi.nlm.nih.gov/sutils/genom\\_table.cgi](http://www.ncbi.nlm.nih.gov/sutils/genom_table.cgi)) since only 89 kbp of its genome has been sequenced. The presence of NifD is given as a marker for the nitrogenase. Completely sequenced strains are given in bold.

doi:10.1371/journal.pone.0013846.t002

The genomes of the *Vibrionaceae* harbor a membrane-bound H<sub>2</sub>-evolving hydrogenase (Fig. S2, supporting information) and a second membrane-bound hydrogenase. This is the necessary combination that can be used under anaerobic conditions to establish a proton gradient by hydrogen cycling in a single cell [49].

Additionally, the genome of *N. caesariensis* (former *Oceanospirillum* [50]) is worth mentioning. It contains a membrane-bound enzyme, a cyanobacterial like uptake hydrogenase, a sensor, and a bifunctional hydrogenase. A phylogenetic analysis confirmed that the HypX encoded in its genome belongs to the group of hydrogenase maturation factors (Fig. S3, supporting information). HypX was shown to render the soluble hydrogenase of the Knallgas bacterium *Ralstonia eutropha* oxygen insensitive [51]. The membrane-bound hydrogenase of *N. caesariensis* is a close relative of the same hydrogenase of *R. eutropha* (Fig. S4, supporting information), which is evidence that this bacterium and the *Roseovarius* strains are able to perform aerobic hydrogen oxidation in marine environments.

## Distribution of hydrogenases in metagenomic databases

Single bacterial strains allow a detailed analysis of part of the genomes that occur in the specific environment they have been isolated from. However, isolated strains provide only a glimpse on the genetic diversity that might be present in the habitat from which they originate, given that most microbial strains are unculturable [52–54]. Therefore, we searched the global ocean sampling database (GOS)[32–34] with the same representative hydrogenases as given in Table 3 and the representatives of the small hydrogenase subunits (Fig. S5 to S7, supporting information).

This database contains millions of sequence reads that have been obtained mostly from biological samples with a particle size of 0.2 to 0.8 μm. Due to this size fractionation, the major proportion of the sequences belongs to *Pelagibacter ubique* and the *Prochlorococcus/Synechococcus* group of cyanobacteria [33]. Since the large number of sequences in the Sargasso Sea metagenome belonging to the *Shewanellaceae* and the *Burkholderiaceae* was discussed to be a contamination [55] Station 11 was not included in the analysis.

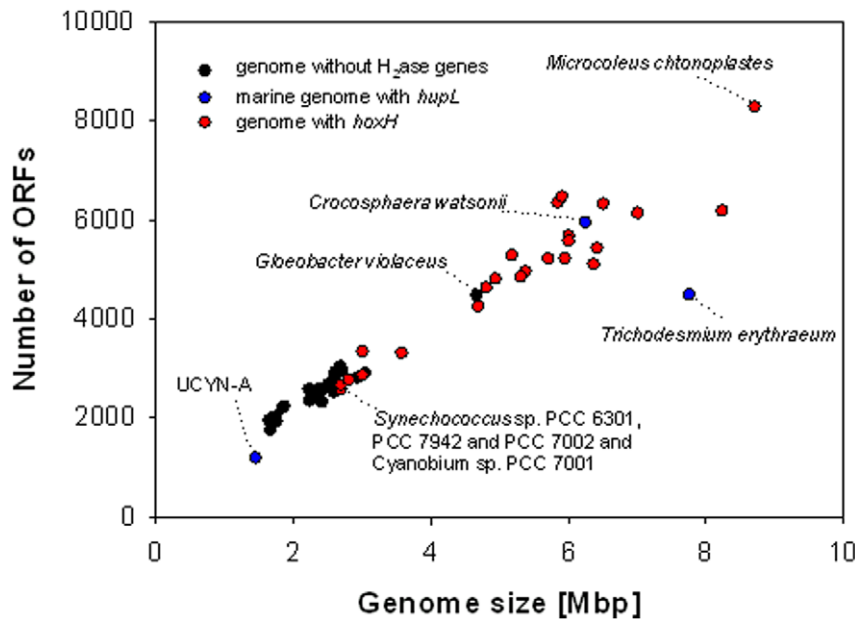

**Figure 1. Comparison of cyanobacterial genome sizes and the distribution of the bidirectional NAD(P) linked hydrogenase gene *hoxH*.** Genomes without the bidirectional hydrogenase are depicted in black and those with it are red. The marine diazotrophic cyanobacteria containing the genes of the uptake hydrogenase *hupL* are shown in cyan. The cluster of black circles at the lower left end of the line represents the small genomes of the *Prochlorococcus* and *Synechococcus* strains. doi:10.1371/journal.pone.0013846.g001

We could not detect any cyanobacterial bidirectional hydrogenase in the samples taken from the open ocean. All the cyanobacterial HoxH sequences that could be found in the database are from a single sample taken at Punta Comorant, a hypersaline pond with low oxygen levels [56] on the Galapagos Islands (Fig. 2). These sequences were most similar to the available bidirectional hydrogenases of *Synechococcus* strains (Fig. S8, supporting information). Thus, the GOS sampling and sequencing effort should have been able to capture any HoxH sequence present in the *Prochlorococcus*/*Synechococcus* group. Although it has to be taken into account that environmental sequencing does not capture 100% of the present DNA sequences it seems highly probable that this cyanobacterial hydrogenase is

absent in these strains in these environments as already deduced from the whole genomes (Table 2, Table S1, supporting information).

These findings are also corroborated when looking at the *hoxH* sequences of the *Burkholderiaceae*. Although these bacteria make up a major fraction of all the oceanic metagenome sequences, there are only representatives from Punta Cormorant with this hydrogenase (Fig. 2), whereas no sequences of this group have been retrieved from the open ocean. Altogether 48 *hoxH* sequences could be found but apart from three coastal stations (Mangrove on Isabella Island, Cape May and Dirty Rock), which accounted for 4 sequences all of the other 44 were exclusively from Punta Cormorant. This confirms the presence of *hoxH* in

**Table 3. Hydrogenase and HypX sequences used for searches of the completely sequenced genomes and the GOS metagenomic database.**

| Hydrogenase                                                      | Organism                            | Accession number |
|------------------------------------------------------------------|-------------------------------------|------------------|
| Fe-hydrogenase                                                   | <i>Methanocaldococcus jannschii</i> | Q58194           |
| FeFe-hydrogenase                                                 | <i>Clostridium pasteurianum</i>     | P29166           |
| NiFe-hydrogenase group 1 Membrane-bound H <sub>2</sub> uptake    | <i>Desulfovibrio vulgaris</i>       | P21852           |
| NiFe-hydrogenase group 2a Cyanobacterial uptake                  | <i>Nostoc</i> sp. PCC 7120          | NP_484720        |
| NiFe-hydrogenase group 2b H <sub>2</sub> -Sensing                | <i>Ralstonia eutropha</i>           | NP_942663        |
| NiFe-hydrogenase group 3a F <sub>420</sub> -reducing             | <i>Methanocaldococcus jannschii</i> | Q60338           |
| NiFe-hydrogenase group 3b Bifunctional NAD(P) linked             | <i>Chlorobium tepidum</i> TLS       | NP_662771        |
| NiFe-hydrogenase group 3c MV-reducing                            | <i>Methanococcus voltae</i>         | ZP_02193988      |
| NiFe-hydrogenase group 3d Bidirectional NAD(P) linked            | <i>Synechocystis</i> sp. PCC 6803   | BAA18091         |
| NiFe-hydrogenase group 4 Membrane-bound H <sub>2</sub> -evolving | <i>Escherichia coli</i>             | NP_417201        |
| NiFe-hydrogenase maturation protein HypX                         | <i>Ralstonia eutropha</i>           | NP_942660        |

The hydrogenases were classified according to Vignais et al. 2001 [20]. doi:10.1371/journal.pone.0013846.t003



**Table 4.** Marine bacteria with FeFe-hydrogenases and NiFe-hydrogenases of the different classes.

| Coastal/open ocean | strain                                          | FeFe      | group 1      | group 2a    | group2b     | group 3a | group 3b     | group 3c     | group 4     | HypX      |
|--------------------|-------------------------------------------------|-----------|--------------|-------------|-------------|----------|--------------|--------------|-------------|-----------|
|                    | <b>Actinobacteria</b>                           |           |              |             |             |          |              |              |             |           |
| C                  | <i>Mycobacterium marinum</i> M                  |           | YP_001850173 |             |             |          | YP_001851771 |              |             |           |
| O                  | <i>Rhodococcus erythropolis</i> PR4             |           | YP_002766098 |             |             |          | YP_002766851 |              |             |           |
|                    | <b>Bacteroidetes/Chlorobi</b>                   |           |              |             |             |          |              |              |             |           |
| C                  | <i>Flavobacteria bacterium</i> MS024-2A         |           | ZP_03702421  |             |             |          |              |              |             |           |
| C                  | <i>Prosthecochloris aestuarii</i> DSM 271       |           | YP_002015547 |             |             |          | YP_002016588 |              |             |           |
| O                  | <i>Robignitalea biformata</i> HTCC2501          |           | ZP_01119574  |             |             |          |              |              |             |           |
|                    | <b>Mollicutes/others</b>                        |           |              |             |             |          |              |              |             |           |
| C                  | <i>Candidatus Koribacter versatilis</i> Elin345 |           | YP_593314    |             |             |          |              |              |             |           |
| C                  | <i>Planctomyces maris</i> DSM 8797              |           |              |             |             |          | ZP_01852867  |              |             |           |
| C                  | <i>Verrucomicrobiae bacterium</i> DG1235        |           |              |             |             |          | YP_002715357 |              |             |           |
|                    | <b>Proteobacteria</b>                           |           |              |             |             |          |              |              |             |           |
| C                  | <i>Magnetococcus</i> sp. MC-1                   |           | YP_866409    |             |             |          | YP_866399    |              |             |           |
|                    | <b><math>\alpha</math>-Proteobacteria</b>       |           |              |             |             |          |              |              |             |           |
| C                  | <i>Labrenzia aggregata</i> IAM 12614            |           | ZP_01550392  |             | ZP_01550270 |          |              | ZP_01545563  |             |           |
| C                  | <i>Labrenzia alexandrii</i> DFL-11              |           |              |             |             |          |              | YP_002610401 |             |           |
| O                  | <i>Roseovarius</i> sp. HTCC2601                 |           | ZP_01443057  |             | ZP_01443054 |          |              |              |             |           |
| C                  | <i>Roseovarius</i> sp. TM1035                   |           | ZP_01881109  |             | ZP_01881113 |          |              |              |             |           |
| C                  | <i>Sagittula stellata</i> E-37                  |           | ZP_01748533  |             | ZP_01748530 |          |              |              |             |           |
| O                  | <i>Sphingopyxis alaskensis</i> RB2256           |           |              | YP_611130   |             |          |              |              |             |           |
|                    | <b><math>\delta</math>-Proteobacteria</b>       |           |              |             |             |          |              |              |             |           |
| C                  | <i>Hahella chejuensis</i> KCTC 2396             |           |              |             |             |          |              | YP_431451    |             |           |
| O                  | <i>Neptuniibacter caesariensis</i>              |           | ZP_01166595  | ZP_01167270 | ZP_01166020 |          |              |              | ZP_01166042 | YP_942640 |
| C                  | <i>Psychromonas ingrahamii</i> 37               |           |              |             |             |          |              |              |             |           |
| C                  | <i>Shewanella baltica</i> OS155                 |           | YP_001050263 |             |             |          |              |              |             |           |
| C                  | <i>Shewanella baltica</i> OS185                 |           | YP_001366120 |             |             |          |              |              |             |           |
| C                  | <i>Shewanella baltica</i> OS195                 |           | YP_001554352 |             |             |          |              |              |             |           |
| C                  | <i>Shewanella baltica</i> OS223                 |           | YP_002358323 |             |             |          |              |              |             |           |
| C                  | <i>Shewanella frigidimarina</i> NCIMB 400       |           | YP_750788    |             |             |          |              |              |             |           |
| C                  | <i>Shewanella putrefaciens</i> CN-32            |           | YP_001183609 |             |             |          |              |              |             |           |
| C                  | <i>Shewanella</i> sp. ANA-3                     | YP_868355 | YP_869516    |             |             |          |              |              |             |           |
| C                  | <i>Shewanella</i> sp. MR-4                      | YP_735375 | YP_733952    |             |             |          |              |              |             |           |
| C                  | <i>Shewanella</i> sp. MR-7                      |           | YP_738201    |             |             |          |              |              |             |           |
| C                  | <i>Shewanella</i> sp. W3-18-1                   |           | YP_963312    |             |             |          |              |              |             |           |

Table 4. Cont.

| Coastal/open ocean  | strain                                | FeFe | group 1     | group 2a | group 2b | group 3a | group 3b     | group 3c | group 3d | group 4     | HypX |
|---------------------|---------------------------------------|------|-------------|----------|----------|----------|--------------|----------|----------|-------------|------|
| C                   | <i>gamma proteobacterium</i> NORS-1-B |      |             |          |          |          | YP_002656756 |          |          |             |      |
| <b>Vibrionaceae</b> |                                       |      |             |          |          |          |              |          |          |             |      |
| C                   | <i>Photobacterium profundum</i> 3TCK  |      |             |          |          |          |              |          |          | ZP_01218749 |      |
| O                   | <i>Photobacterium</i> sp. SKA34       |      | ZP_01160131 |          |          |          |              |          |          | ZP_01161272 |      |
| C                   | <i>Vibrio angustum</i> S14            |      | ZP_01234606 |          |          |          |              |          |          | ZP_01234036 |      |

The presence of HypX, an accessory gene responsible for oxygen tolerance of the soluble hydrogenase of *Ralstonia eutropha*, was included in the search. doi:10.1371/journal.pone.0013846.t004

shallow coastal environments and ponds in a variety of different bacterial groups.

The largest group of sequences in the metagenome database were those of the membrane-bound NiFe-hydrogenases. Again most of the 51 sequences were found at Punta Cormorant, although 11 sequences were detected in the datasets of coastal stations (New Harbor, Dirty Rock, Yucatan Channel, Nags Head, a Mangrove on Isabella Island) and two were found in the open ocean (outside Seychelles and 250 miles of Panama) (Fig. 3).

Cyanobacterial-like uptake hydrogenases could also be found in the metagenomic dataset (Fig. 4). Because of the size fractionation (0.2–0.8  $\mu\text{m}$ ) most of the larger diazotrophic cyanobacteria have been excluded from this analysis. Therefore, although many of the samples have been taken in regions known to be inhabited by this cyanobacterial group only two sequences could be retrieved from the whole dataset. A total of 35 sequences could be found. Most of these sequences originate from coastal sites (28) but four sequences are from the open ocean (Sargasso Sea, Reunion Island and 250 miles off Panama City).

Searches for the small hydrogenase subunit genes retrieved 23 sequences of the bidirectional NAD(P)<sup>+</sup>-linked hydrogenases, 37 of the membrane bound H<sub>2</sub> uptake hydrogenases and 18 of the cyanobacterial-like uptake hydrogenases. In all these cases the numbers are close to the expected number when comparing the gene sizes of the respective large and small hydrogenase genes (Fig. S5 to S7, supporting information).

Sequences of the oxygen sensitive FeFe-hydrogenases retrieved from the GOS database were from a Mangrove (Isabella Island) and the hypersaline pond at Punta Cormorant. In all other samples no FeFe-hydrogenase was found (Fig. 5) and none of the archaeobacterial hydrogenases were found in the metagenome sequences.

Recently large amounts of metatranscriptomics data became available (e.g. [57]). A search of the respective dataset revealed the presence of three transcripts of membrane-bound H<sub>2</sub>-uptake hydrogenases. One transcript was most similar to a cyanobacterial uptake hydrogenase, one to the *Flavobacteriaceae* and one to the *Bradyrhizobiaceae*. In this dataset only samples from the open ocean are available.

#### Detection of sequences of the bidirectional NAD(P)-linked NiFe-hydrogenase in the North Atlantic, Mediterranean Sea, North Sea, Baltic Sea, and two freshwater lakes

Although all NiFe-hydrogenases share two characteristic motifs with altogether four cysteins at the N- and C-terminus for the binding of the NiFe active site, it is impossible to design degenerated primers that bind to the genes of all different classes of these enzymes. Therefore, we limited our effort to a single class and constructed degenerated primers specific for the bidirectional NAD(P)-linked hydrogenases of cyanobacteria, the *Chloroflexaceae* and some proteobacteria. In cyanobacteria this enzyme is known as the bidirectional hydrogenase. It is closely related to the soluble hydrogenase of *Ralstonia eutropha* and the respiratory complex I [58,59].

We collected surface water from Stollergrundrinne outside the Kiel fjord (Baltic Sea), in the Norderpiep west of Büsum (North Sea) and two freshwater lakes in northern Germany, Westensee and Selenter See. These samples were sequentially filtered on 10  $\mu\text{m}$  and 0.2  $\mu\text{m}$  filters and DNA isolated from the retained material. In samples from all these locations we could detect *hoxH*. In Fig. 6 the distribution of sequences on the different bacterial groups is shown for the different stations.

From the Baltic Sea as well as the fresh water lakes we could amplify a large number of cyanobacterial *hoxH* that are most similar to the *Chroococcales* (most closely related to *Cyanothece*, *Microcystis* and



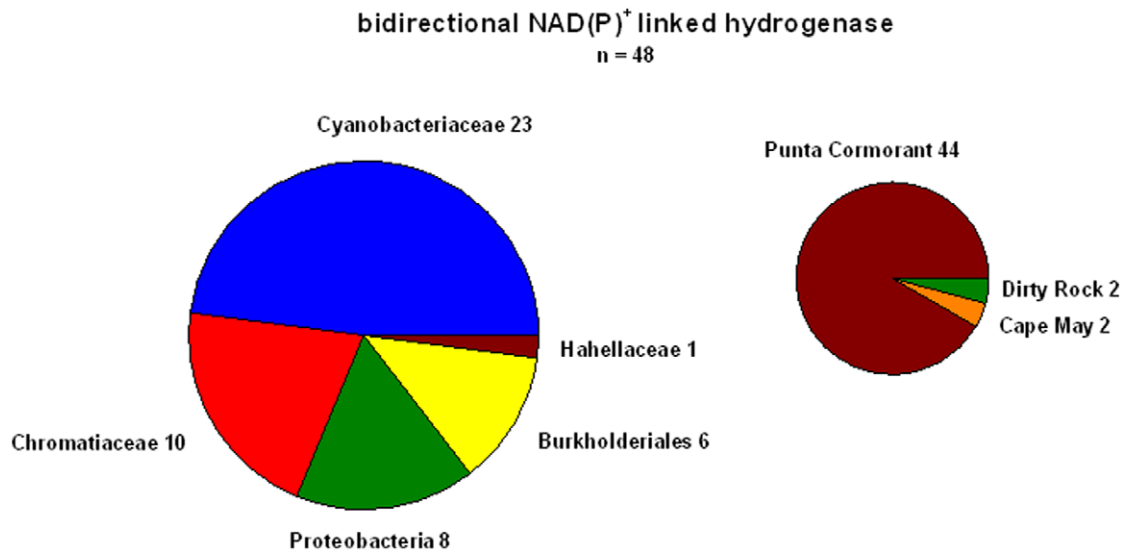

**Figure 2. Distribution of bidirectional NAD(P) linked hydrogenases found in the GOS database of the different prokaryotic groups.** The *hoxH* sequence of *Synechocystis* sp. PCC 6803 (Table 3) was used for the search and a total of 48 sequences has been found. On the right the number of sequences from the different sampling stations is shown. doi:10.1371/journal.pone.0013846.g002

*Synechocystis*) or the filamentous, heterocystous *Nostocaceae*. In the North Sea the  $\alpha$ -proteobacterial group *Rhodobacteraceae* made up the same proportion as all the cyanobacterial sequences taken together. From the freshwater mesotrophic lakes Westensee and Selenter See we could only amplify cyanobacterial *hoxH* (*Chlorococcales*, *Nostocaceae* and *Oscillatoriales*) and in each case some sequences of methylophilic bacteria and *Dictyoglomaceae*.

In contrast to this, all attempts to amplify sequences of the bidirectional NAD(P)-linked hydrogenases from the samples taken in the North Atlantic off the west African coast and the Ionian Sea (Mediterranean Sea) were negative. This corroborates that the

open ocean and marine oligotrophic waters are devoid of this hydrogenase type.

## Discussion

Any conclusion concerning the activity of a gene from its environmental distribution is hampered by the fact that it is not necessarily expressed in a specific environment. Genomes might have genes in store that are not necessary to survive under the present-day conditions, but can be used to invade other niches or to prepare the organism for a drastic change. In the case of the

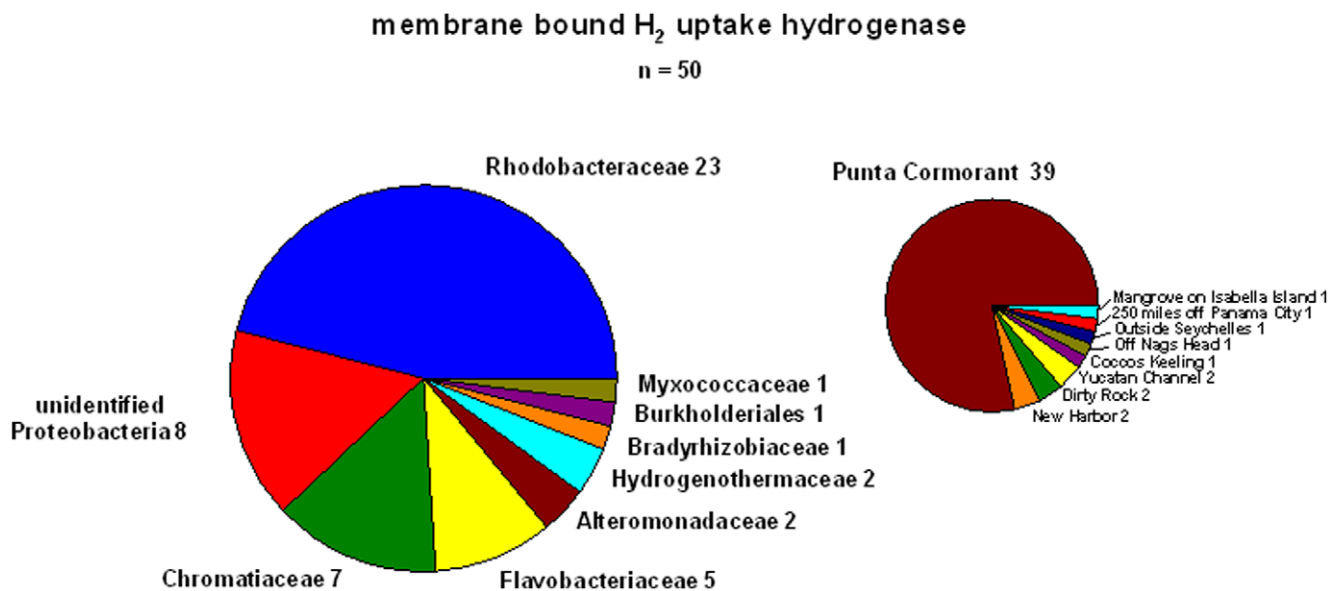

**Figure 3. Distribution of membrane-bound hydrogenases found in the GOS database of the different prokaryotic groups.** The *hupL* sequence of *Desulfovibrio vulgaris* (Table 3) was used for the search and a total of 51 sequences has been retrieved. On the right the number of sequences from the different sampling stations is shown. doi:10.1371/journal.pone.0013846.g003

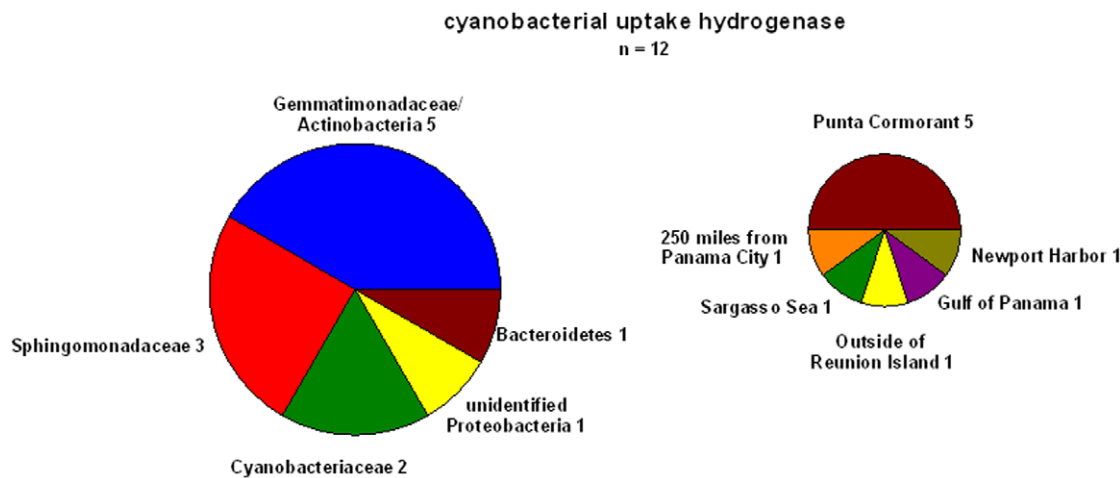

**Figure 4. Distribution of cyanobacterial-like uptake hydrogenases found in the GOS database of the different prokaryotic groups.** The *hupL* sequence of *Nostoc* sp. PCC 7120 (Table 3) was used for the search and a total of 35 sequences has been retrieved. On the right the number of sequences from the different sampling stations is shown. doi:10.1371/journal.pone.0013846.g004

distribution of hydrogenases found in this work, this scenario seems highly unlikely. For several reasons described in detail below, we think that biological hydrogen production and consumption, as depicted in Fig. 6, might be common in a large number of marine and freshwater habitats.

All strains from the open ocean were free of the bidirectional NAD(P) linked hydrogenase. Neither the cyanobacterial genomes nor all of the heterotrophic bacteria (Table 2 and Table S1, supporting information) or the metagenomic sequences harbor this hydrogenase. In addition, our efforts to amplify these hydrogenase genes from the North Atlantic or the Mediterranean Sea were unsuccessful. Since the diazotrophic cyanobacterial strains and the heterotrophic bacteria from the open ocean have other types of hydrogenases, there is no selection pressure against these enzymes per se. However, there is a clear bias of the bidirectional type to environments such as coastal marine waters, ponds, freshwater lakes and microbial mats (Table 2, Fig. 2, Fig. 6

and Table S1, supporting information), where cyanobacteria and heterotrophic bacteria might encounter micro-oxic or anaerobic conditions. In cyanobacteria this type of enzyme was shown to be activated under anaerobiosis and to be responsible for fermentative hydrogen production [60]. This is corroborated by the distribution of the PFOR gene, *nifH*, in the same cyanobacteria (Table 2).

Starting from anaerobiosis, the bidirectional hydrogenase is known to be used as an electron valve, when cells switch from fermentation to photosynthesis [61–64]. These findings might explain the high hydrogen concentration found in the morning hours in a eutrophic lake that coincided with the phytoplankton maximum [13]. Oxygen depletion due to high respiratory activity during the night could have activated the hydrogenase in this zone and elicited a fermentative hydrogen production in the dark that continued at dawn until the next morning when photosynthesis resumed, thus causing supersaturating  $H_2$  concentrations. A

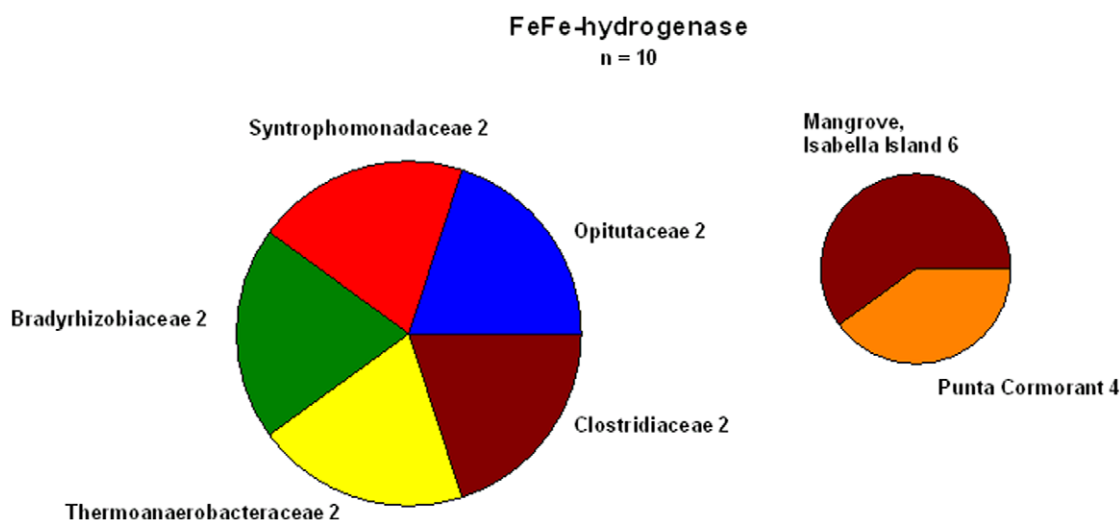

**Figure 5. Distribution of FeFe-hydrogenases found in the GOS database of the different prokaryotic groups.** The *hydA* sequence of *Clostridium pasteurianum* (Table 3) was used for the search and a total of 10 sequences have been found. On the right the number of sequences from the different sampling stations is shown. doi:10.1371/journal.pone.0013846.g005

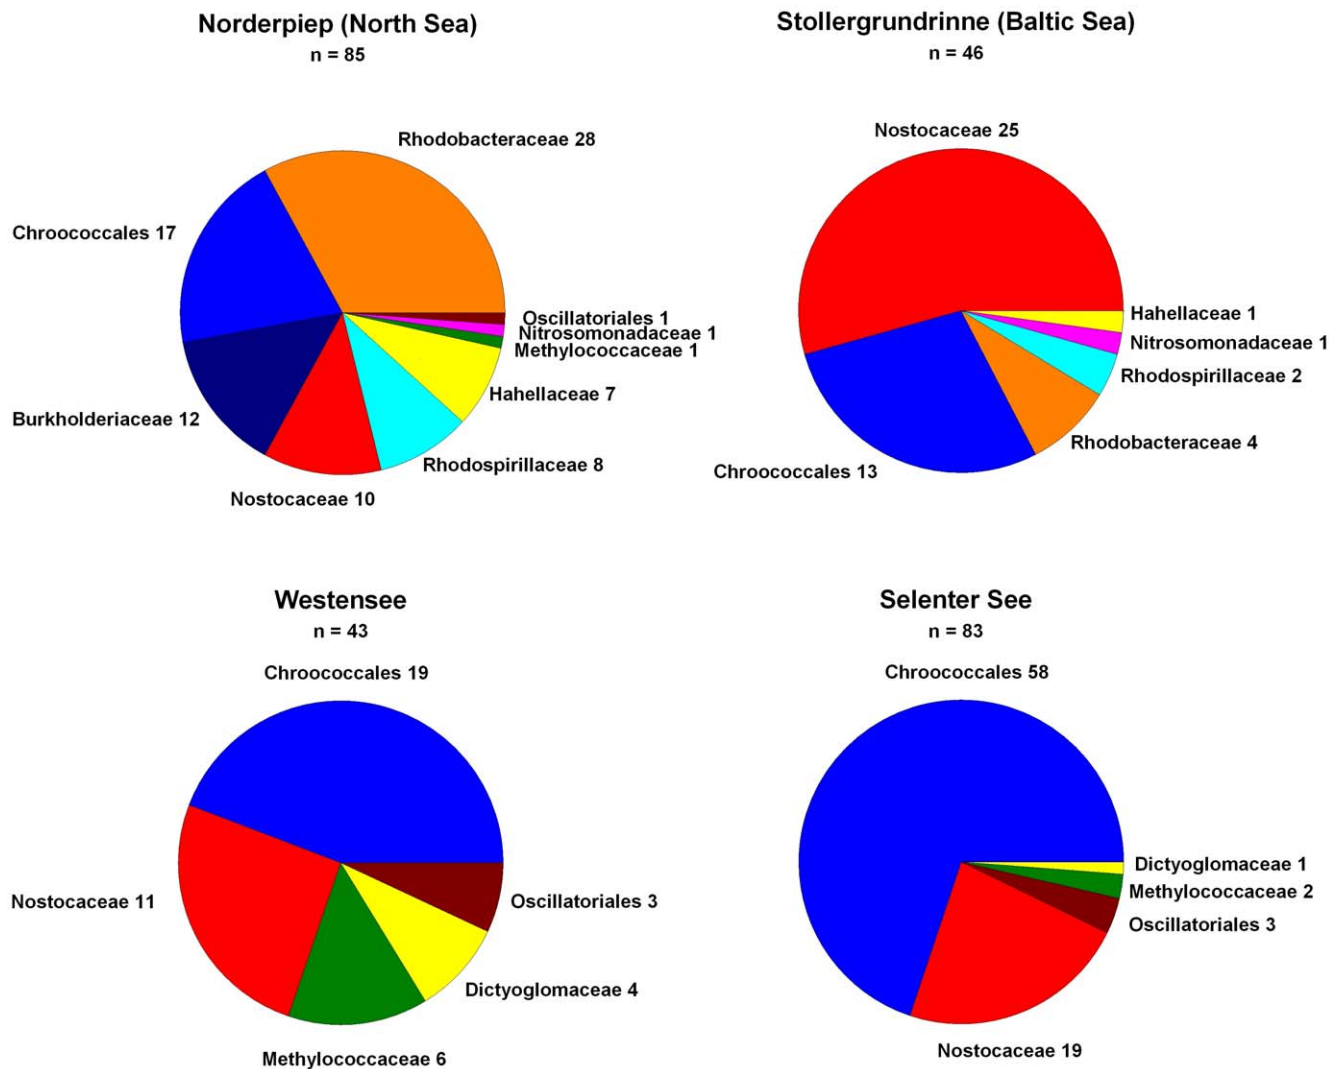

**Figure 6. Distribution of bidirectional NAD(P) linked hydrogenases in samples taken from Norderpiep (North Sea), Stollergrundrinne (Baltic Sea) and the freshwater lakes Westensee and Selenter See.**  
doi:10.1371/journal.pone.0013846.g006

similar diel variation of hydrogen concentrations has also been described for cyanobacterial mats (see e.g. [65]).

In both cases, hydrogen production is certainly not confined to the resident cyanobacteria but can also result from the activity of algae and other heterotrophic bacteria living in the same community.

The large number of genomes of marine bacteria from surface seawaters containing the membrane-bound  $H_2$ -uptake hydrogenase is remarkable. A search of the current marine metatranscriptomics data [57] revealed the expression of these hydrogenases in cyanobacteria as well as other bacteria in the open ocean.

The membrane-bound hydrogenase gene clusters found in the *Rhodobacteraceae* (Fig. S1 supporting information) include all the accessory genes that are known from the membrane-bound hydrogenase of *R. eutropha*. One of the four hydrogenases of *N. caesariensis* and the hydrogenases of the *Roseovarius* strains are closely related to this hydrogenase as revealed by phylogenetic analysis (Fig. S1 and S4, supporting information). This type of enzyme is known to be oxygen insensitive and was shown to be active at ambient oxygen concentrations [66,67]. Electrochemical investigations of this hydrogenase found measurable hydrogen

uptake down to levels of 1 to 10 nM [67], which is well in the range of  $H_2$  concentrations in surface waters. One of these strains (*Roseovarius* sp. HTCC 2601) was isolated from the Sargasso Sea, but all of the others were from coastal areas. In these regions, this  $\alpha$ -proteobacterial subclass makes up as much as 24% of the bacterioplankton [68] and therefore, their hydrogenases might be widespread in these environments.

Mycobacteria, known to colonize aquatic ecosystems, take up hydrogen in the same concentration range under aerobic conditions [69], supporting the notion that hydrogen consumption in these environments is a common microbial feature. Even though the supersaturating concentrations found in surface waters are below the threshold necessary to support growth exclusively on  $H_2$ , hydrogen uptake could add to the ability to survive in a variety of these habitats. Similar suggestions have already been made for hydrogen uptake for long-term survival of bacteria [70] and for the ability to oxidize carbon monoxide in the coastal ocean [71,72]. These suggestions coincide with the aerobic hydrogen uptake demonstrated for particle sizes between 0.2 and 5  $\mu m$  in coastal waters [11]. This trait is especially important for litho- and heterotrophic bacteria that have to capitalize on as much of the

available energy supply as possible, but can be disregarded by photoautotrophs like cyanobacteria.

Bacterial activity was found to be capable of depleting oxygen in marine organic aggregates. In particles as small as 1.5 mm, anoxic conditions emerged. In the same aggregates no methanogenic or sulfate-reducing bacteria could be detected [73]. Our results suggest that these anaerobic microniches might be specifically occupied by bacteria of the *Vibrionaceae* (Fig. S2, supporting information). Since their membrane-bound  $H_2$ -evolving NiFe-hydrogenases are encoded in conjunction with subunits of the formate dehydrogenase it seems highly likely that it performs the formate:hydrogen lyase reaction. This reaction is well known from *E. coli*, where it detoxifies formate produced during fermentation, evolves hydrogen and might be involved in an additional energy-generating step [24]. The membrane-bound hydrogen uptake hydrogenase encoded in the same genomes would allow hydrogen cycling and might be used for additional net transport of protons across the cell membrane [49].

The *Alteromonadaceae* are widespread in marine waters. Two different ecotypes have been sequenced, one is predominant in surface waters whereas the other is known from the deep Mediterranean Sea. The deep ecotype was originally found to harbor the genes of the membrane-bound  $H_2$  uptake hydrogenase but our analysis and that of others [74] also found the same sequences at the surface of the Sargasso Sea. It was speculated that these two strains are separated by either being associated with small aggregates (surface type) or large aggregates (deep ecotype) [75]. This might be further support for the use of hydrogenases in transiently anoxic microniches in the ocean.

The diel variation of the  $H_2$  concentration in marine surface waters [8,9] that parallels solar radiation is still awaiting conclusive explanation. Nitrogen fixation is a major source of hydrogen in terrestrial ecosystems [4]. In-situ measurements of the diazotrophic cyanobacterium *T. thiebautii* suggest that it is a negligible source of hydrogen in the Sargasso Sea [15]. Therefore, nitrogen fixation by filamentous cyanobacteria is an insignificant source of  $H_2$  in aquatic ecosystems. Interestingly, a unicellular marine diazotrophic cyanobacterium has been shown to be devoid of the uptake hydrogenase [37] and to produce hydrogen while fixing nitrogen [76]. In general unicellular cyanobacteria perform a temporal separation of the oxygen sensitive energy consuming nitrogen fixation process and oxygenic energy generating photosynthesis between night and day, but some strains also fix nitrogen during the light phase [76,77]. Unicellular strains are known to provide a considerable part of fixed nitrogen in marine waters [78,79] and might therefore be responsible for part of the evolved  $H_2$ . The newly discovered unicellular cyanobacteria without photosystem II [40,80] harbor the genes of the cyanobacterial uptake hydrogenase (Table 2), which is most similar to those of the *Cyanothece* group (Fig. S4, supporting information) as expected. Therefore, these strains should be able to recycle the  $H_2$  evolved by the nitrogenase.

The distribution of cyanobacterial nitrogen fixers in the ocean and their seasonal abundance are poorly characterized although qPCR data has shown that all groups are widely distributed [81,82]. One investigation suggests that their distribution is patchy and their rate of nitrogen fixation highly variable [79] and might therefore result in hydrogen evolution in some parts and very low or no evolution in other parts.

Although unicellular nitrogen-fixing cyanobacteria might be responsible for hydrogen evolution in some regions, part of the  $H_2$  produced during the day might be of photochemical origin, such as dissociation of organic matter by UV light [17].

Coastal waters are rich in hydrogenase sequences, as suggested by our analysis of complete genomes (Table 2, 4, Table S1, supporting information), and the number of sequences we could amplify of a single class of NiFe-hydrogenases from the North Sea and the Baltic Sea (Fig. 5). The apparent scarcity of sequences from coastal samples in the GOS database can be explained by the filtration procedure. Since mainly particle sizes between 0.2 and 0.8  $\mu m$  have been used for DNA isolation many of the coastal bacteria and particle associated bacteria have been excluded from the analysis. We hypothesize that the membrane-bound  $H_2$  evolving hydrogenase in the genomes of the *Vibrionaceae* might be used as indicator for bacteria that colonize the inner parts of organic aggregates and thus, have not been sequenced yet in the GOS database.

Our analysis shows that the genetic repertoire of bacteria from surface waters of different environments enables them to produce hydrogen either by their nitrogenase, by hydrogenases linked to fermentative pathways (such as the bidirectional NAD(P) linked hydrogenase), or the membrane-bound  $H_2$ -evolving hydrogenase. A number of bacteria could oxidize hydrogen as an energy source probably down to the lower nM range and might be responsible for biological hydrogen consumption in freshwater and marine systems.

This study intends to deliver a first key to the elucidation of the underlying biological processes of hydrogen turnover in aquatic ecosystems. Whether a specific body of water is a hydrogen sink or source will depend on a number of factors such as primary production, nitrogen fixation, the concentration of photodegradable organic compounds and organic particles, and the availability of electron acceptors. This is the first evidence that microorganisms can be an integral part of hydrogen turnover in marine waters, but much more remains to be learned. This is especially true when considering oxygen minimum zones [83] that have not been investigated for the presence of hydrogen or hydrogenases until now.

## Materials and Methods

### Sample collection

Samples were collected from the surface. In the North Sea water was collected in the Norderpiep (54°13'N/8°27'E), in the Baltic Sea it was collected in the Stollergundrinne (54°29'N/10°13'E) and from the freshwater lakes Selenter See (54°18'25N/10°28'53E) and Westensee (54°17'53N/9°57'09E) at least four times a year from every season. These samples were sequentially filtered on 10  $\mu m$  and 0.2  $\mu m$  filters with a peristaltic pump 620 S (Watson-Marlow Bredel).

Samples from the Mediterranean Sea were taken from the Ionian Sea at station 2 (36°41'N/21°39'E), station 3 (36°50'N/21°31'E), station 5.2 (36°37'N/21°17'E) and station 6 (36°42'N/21°04'E). In this case 5 l water from a depth of 5 m was filtered on 5  $\mu m$  and then on 0.2  $\mu m$ .

The samples from the North Atlantic were taken during the Poseidon 284 cruise at 18°N/30°W, 25°N/30°W and 29°/30°W in April 2002.

For DNA isolation the UltraClean™ Soil DNA Kit (Mo Bio, Carlsbad CA, USA) was used.

### DNA amplification and sequence analysis

Sequences of the bidirectional NAD(P)-linked hydrogenase were amplified with the primers HoxH-f GTATYTGYYGATTTGTCCTGT and HoxH-r GGCATTTGTCTCTCTGYATGTGT were used. Prior to 40 cycles of the program the DNA was denatured for 5 min at 95°C. The temperature program was as

follows: 30 sec at 95°C, 40 sec at 50°C, 2 min at 72°C. In a final step the temperature was kept at 72°C for 10 min. The reaction contained 0.5 µM of the two primers, 0.2 mM of dNTPs, 2.5 mM MgCl<sub>2</sub>, 0.025 U/µl Taq polymerase (MBI Fermentas, St. Leon-Roth, Germany) and 10x buffer as recommended by the manufacturer in a total volume of 50 µl. Of each sample different amounts of DNA between 2 and 100 ng were tested as template. If no PCR product was detected DNA concentrations were increased at least 10 times. Positive controls were run in parallel to prove the efficiency of the PCR. The approximate size of the product is around 1190 bp and covers close to 84% of the *hoxH* gene.

The resulting PCR products were ligated into the pCRII-topo (Invitrogen), sequenced with the Big-Dye Kit, and applied on a 96 capillary sequencer (3730 DNA Analyzer, Applied Biosystems).

If possible contigs were assembled from the obtained sequence data and the respective sequences deposited in the genebank (Accession numbers GQ454414 to GQ454443 and GU238237 to GU238258) including two additional cyanobacterial *hoxH* sequences of *Aphanothece halophytica* and *Mastigocladus laminosus* SAG 4.84 (Accession numbers GQ454444 and GQ454445).

### Database searches

The genebank, cyanobase, and the GOS database were searched for hydrogenase specific sequences by using the hydrogenase sequences given in Table 3. Retrieved sequences were either run against the genebank by using the BLAST algorithm [38] to deduce the closest homolog or searched for the signature sequences as given by Vignais and Billoud [19] to unambiguously classify the respective hydrogenase. In case of the GOS database, the sequences found were aligned, and, if possible, larger contigs were formed from the same sampling station and used for all further analysis.

### Phylogenetic analysis

In the case of critical candidates or unclear phylogenetic affiliation phylogenetic trees were used. Sequence alignments were made with ClustalW [84]. After manual optimization and removal of gaps from the alignments, parsimony, maximum likelihood, and distances were calculated with the 3.63 release of the PHYLIP package [85], using the Jones-Taylor-Thornton matrix and the algorithm of Fitch and Margoliash [86]. Maximum parsimony and distances were calculated for 1000 bootstraps and maximum likelihood for 100 bootstraps. The Unix-cluster at the computer center of the University of Kiel was used for most of the calculations. The resulting trees are given in Fig. S3 to S5 (supporting information).

### Supporting Information

**Table S1** Complete list of all marine bacteria searched for hydrogenase genes  
Found at: doi:10.1371/journal.pone.0013846.s001 (0.05 MB XLS)

**Figure S1** Structure of the gene cluster of the membrane bound hydrogen uptake NiFe-hydrogenase of marine *Rhodobacteraceae* and the delta-proteobacterium *Neptuniibacter caesariensis*. The structural genes of the hydrogenase (*hupS*, *hupL* and *hupZ* the membrane bound cytochrome) are shown in blue. Red genes (*hoxAJBC*) are involved in the regulation of the hydrogenase. *HoxJ* encodes a histidine kinase that is known to interact with a hydrogen sensor encoded by *hoxB* and *hoxC* and regulates the activity of the response regulator encoded by *hoxA*. *HupK* might encode a protein necessary to express an oxygen-tolerant hydrogenase. Accessory genes known to be necessary for this type of membrane

hydrogenase are shown in grey, whereas grey patterned genes are general accessory genes for all NiFe-hydrogenases. Genes depicted in green are putative proteases that cleave the C-terminus of the hydrogenase. *HypX* of *Ralstonia eutropha* is known to render its soluble hydrogenase oxygen tolerant.

Found at: doi:10.1371/journal.pone.0013846.s002 (0.06 MB DOC)

**Figure S2** Structure of three hydrogenase gene clusters of *Vibrio* isolated from marine environments that are most similar to the energy converting H<sub>2</sub>-evolving NiFe-hydrogenases. The color code is the same as in Figure S1. Genes shown in plaid are part of the formate dehydrogenase. *FhlA* is the transcriptional activator of the formate-hydrogen lyase. Those in black and grey-blue are additional subunits of the whole complex.

Found at: doi:10.1371/journal.pone.0013846.s003 (0.05 MB DOC)

**Figure S3** Phylogenetic tree of *HypX*. Representatives of enoyl-CoA hydratase/crotonase have been used as outgroup. The abbreviations and the respective accession numbers are as follows: *Aeoli*, *Aquifex aeolicus* VF5 NP\_213788; *Aehrli*, *Alkalilimnicola ehrlichei* MLHE-1 YP\_742845; *Amarin*, *Acaryochloris marina* MBIC11017 YP\_001520946; *BjapUSDA*, *Bradyrhizobium japonicum* USDA 110 NP\_773566; *Cviola*, *Chromobacterium violaceum* ATCC 12472 NP\_903812; *Daroma*, *Dechloromonas aromatica* RCB YP\_287160; *Frankia Cc* *Frankia* sp. CcI3 YP\_482743; *Frankia EA* *Frankia* sp. EAN1pec YP\_001505433; *MmagAMB*, *Magnetospirillum magneticum* AMB-1 YP\_420998; *MmagMS-1*, *Magnetospirillum magnetotacticum* MS-1 ZP\_00055441; *Mmarina* *Microscilla marina* ATCC 23134 ZP\_01691397; *Mpetro*, *Methylibium petroleiphilum* PM1 YP\_001021998; *Ncaesar*, *Neptuniibacter caesariensis* ZP\_01166042; *Nitrati*, *Nitraturaptor* sp. SB155-2 YP\_001356445; *Pedobac* *Pedobacter* sp. BAL39 ZP\_01883353; *Pnapht*, *Polaromonas naphthalenivorans* CJ2 YP\_982187, *PfluPF-5*, *Pseudomonas fluorescens* PfO-1 YP\_348856; *Reutro*, *Ralstonia eutropha* H16 NP\_942660; *Rferri*, *Rhodoferrax ferrireducens* T118 YP\_525330; *Rmetalli*, *Ralstonia metallidurans* CH34 YP\_583693; *Saverm*, *Streptomyces avermitilis* MA-4680 NP\_828541; *Savermi* *Streptomyces avermitilis* MA-4680 NP\_823962; *Scoelic* *Streptomyces coelicolor* A3(2) NP\_629596; *Sdegra*, *Saccharophagus degradans* 2-40 YP\_526001; *Smalto* *Stenotrophomonas maltophilia* R551-3 YP\_002027502; *Ssedimi*, *Shewanella sediminis* HAW-EB3 YP\_001475080; *Sulfuro*, *Sulfurovum* sp. NBC37-1 YP\_001358952; *Xcamp* *Xanthomonas campestris* pv. *vesicatoria* str. 85-10 YP\_363011

Found at: doi:10.1371/journal.pone.0013846.s004 (0.50 MB DOC)

**Figure S4** Phylogenetic tree of *HupL* sequences. Representatives of the 49 kDa subunit of the complex I have been used as outgroup. The used abbreviations and their respective accession numbers are as follows: *Abac345* *Candidatus Koribacter versatilis* Ellin345 YP\_593314; *Abut4018* *Arcobacter butzleri* RM4018 YP\_001490358; *Afer53993* *Acidithiobacillus ferrooxidans* ATCC 53993 YP\_002219307; *Ahyd7966* *Aeromonas hydrophila* subsp. *hydrophila* ATCC 7966 YP\_857036; *AmacDE* *Alteromonas macleodii* 'Deep ecotype' YP\_002124659; *Aple4074* *Actinobacillus pleuropneumoniae* serovar 1 str. 4074 ZP\_00134404; *AsalA449* *Aeromonas salmonicida* subsp. *salmonicida* A449 YP\_001141617; *Asiam* *Anabaena siamensis* TISTR 8012 AAN65266; *Avar* *Anabaena variabilis* ATCC 29413 YP\_325087; *Bac* *Ellin bacterium* Ellin514 ZP\_03626632; *BBTai1-2* *Bradyrhizobium* sp. *BTAi1* YP\_001220511; *BBTai1-3* *Bradyrhizobium* sp. *BTAi1* YP\_

001236652; Bjap110 *Bradyrhizobium japonicum* USDA 110 NP\_773581; Bphy815 *Burkholderia phymatum* STM815 YP\_001863308; C.fer13031 *Chlorobium ferrooxidans* DSM 13031 ZP\_01386726; C511412 *Cyanothece* sp. ATCC 51142 YP\_001802481; C7424 *Cyanothece* sp. PCC 7424 YP\_002377118; C7822 *Cyanothece* sp. PCC 7822 ZP\_03153783; C8802 *Cyanothece* sp. PCC 8802 ZP\_03142797; Cagg *Chloroflexus aggregans* DSM 9485 YP\_002461848; Caur10-fl *Chloroflexus aurantiacus* J-10-fl YP\_001636362; CCY0110 *Cyanothece* sp. CCY 0110 ZP\_01728928; Chyd *Carboxydotherrmus hydrogeniformans* Z-2901 YP\_360377; Cjej1221 *Campylobacter jejuni* RM1221 YP\_179388; Ckos895 *Citrobacter koseri* ATCC BAA-895 YP\_001455880; Clim245 *Chlorobium limicola* DSM 245 YP\_001942914; CmedTB-2 *Caminibacter mediatlanticus* TB-2 ZP\_01871651; Cpha *Chlorobium phaeobacteroides* DSM 266 YP\_911445; CtepTLS *Chlorobium tepidum* TLS NP\_661672; Cwat8501 *Crocospaera watsonii* WH 8501 ZP\_00519188; Dbac *Desulfomicrobium baculatum* ICC1\_L; DBAV1 *Dehalococcoides* sp. BAV1 YP\_001213724; Deth *Dehalococcoides ethenogenes* 195 YP\_180861; DvulDP4 *Desulfovibrio vulgaris* DP4 YP\_966691; Ecar1043 *Pectobacterium atrosepticum* SCRI1043 YP\_049334; EcolK12 *Escherichia coli* str. K-12 substr. MG1655 NP\_415492; EcolNuoD *Escherichia coli* CAA48363; FACN14a *Frankia alni* ACN14a YP\_712616; FACN14a-2 *Frankia alni* ACN14a YP\_712064; Fbac *Flavobacteria bacterium* MS024-2A ZP\_03702421; FCci3 *Frankia* sp. CcI3 YP\_481046; FEAN *Frankia* sp. EAN1pec YP\_001506830; FEAN2 *Frankia* sp. EAN1pec YP\_001507712; Gaur *Gemmatimonas aurantiaca* T-27 YP\_002759924; Gloeo *Gloeotheca* sp. PCC 6909 AAP04005; GlovSZ *Geobacter lovleyi* SZ YP\_001952291; GlovSZ-2 *Geobacter lovleyi* SZ YP\_001950403; HpyJ99 *Helicobacter pylori* J99 NP\_223293; L8106 *Lyngbya* sp. PCC 8106 ZP\_01619041; Laes *Lyngbya aestuarii* ABD34838; Lint *Lawsonia intracellularis* PHE/MN1-00 YP\_594816; Lmaj *Lyngbya majuscula* CCAP 1446/4 AAO66476; Mavi *Mycobacterium avium* 104 YP\_881873; MJLS *Mycobacterium* sp. JLS YP\_00107040; Mkan *Mycobacterium kansasii* ATCC 12478 ZP\_04750138; Mmag-1-3 *Magnetospirillum magneticum* AMB-1 YP\_421305; MmagMS-1 *Magnetospirillum magnetotacticum* MS-1 ZP\_00052632; Mmar *Mycobacterium marinum* M YP\_001850173; MMCS *Mycobacterium* sp. MCS YP\_639307; Msil *Methylocella silvestris* BL2 YP\_002364007; Msme *Mycobacterium smegmatis* str. MC2 155 YP\_887053; N7120 *Nostoc* sp. PCC 7120 NP\_484720; N7422 *Nostoc* sp. PCC 7422 BAE46791; Nazo 'Nostoc azollae' 0708 ZP\_03768004; Neptuni2 *Neptuniibacter caesariensis* ZP\_01167270; Neptuni1 *Neptuniibacter caesariensis* ZP\_01166595; Npun *Nostoc punctiforme* PCC 73102 AAC16277; Nspu *Nodularia spumigena* CCY 9414 ZP\_01628406; Paes *Prosthecochloris aestuarii* DSM 271 YP\_002015547; Pars *Pyrobaculum arsenaticum* DSM 13514 YP\_001153513; Pdis8503 *Parabacteroides distasonis* ATCC 8503 YP\_001303173; Photob34 *Photobacterium* sp. SKA34 ZP\_01160131; Pisl *Pyrobaculum islandicum* DSM 4184 YP\_929722; Plut *Pelodictyon luteolum* DSM 273 YP\_375349; PMED4NdH *Prochlorococcus marinus* subsp. pastoris str. CCMP1986 NP\_892293; Ppha *Pelodictyon phaeoclathratiforme* BU-1 YP\_002018704; Rcap *Rhodobacter capsulatus* AAA69668; Rcas *Roseiflexus castenholzii* DSM 13941 YP\_001433219; Rcas2 *Roseiflexus castenholzii* DSM 13941 YP\_001433862; ReryPR4 *Rhodococcus erythropolis* PR4 YP\_002766098; RerySK121 *Rhodococcus erythropolis* SK121 ZP\_04384689; Reut *Ralstonia eutropha* H16 NP\_942704; ReutC *Ralstonia eutropha* H16 NP\_942663; ReutG *Ralstonia eutropha* H16 AAA16462; Rgel *Methylibium petroleiphilum* PM1 YP\_001022015; RHTCC2501 *Robiginitalea biformata* HTCC2501 ZP\_01119574; Rhtcc2601 *Roseovarius* sp. HTCC2601 ZP\_01443057; RHTCC2601-Sens *Roseovarius* sp. HTCC2601 ZP\_01443054; Rjos *Rhodococcus jostii* RHA1 YP\_704548; Ropa *Rhodococcus opacus* B4 YP\_002781742; Rpal009 *Rhodopseudomonas palustris* CGA009 NP\_946314; RpalA53 *Rhodopseudomonas palustris* BisA53 YP\_780164; RpalB5 *Rhodopseudomonas palustris* BisB5 YP\_568300; RRS-1 *Roseiflexus* sp. RS-1 YP\_001276649; Rrub *Rhodospirillum rubrum* ATCC 11170 YP\_426250; Rsph17029 *Rhodobacter sphaeroides* ATCC 17029 YP\_001044019; Rsph2.4.1 *Rhodobacter sphaeroides* 2.4.1 YP\_353568; Rtm1035 *Roseovarius* sp. TM1035 ZP\_01881109; Sag12614 *Stappia aggregata* IAM 12614 ZP\_01550392; Sag12614-2 *Stappia aggregata* IAM 12614 ZP\_01550270; Sala2256 *Sphingopyxis alaskensis* RB2256 YP\_611130; Sama *Shewanella amazonensis* SB2B YP\_927554; Save *Streptomyces avermitilis* MA-4680 NP\_828543; SbalOS155 *Shewanella baltica* OS155 YP\_001050263; Sdys197 *Shigella dysenteriae* Sd197 YP\_402612; SentATCC *Salmonella enterica* subsp. enterica serovar Paratyphi A str. ATCC 9150 YP\_152163; SentCT18 *Salmonella enterica* subsp. enterica serovar Typhi str. CT18 NP\_456296; SfumMPOB *Syntrophobacter fumaroxidans* MPOB YP\_847061; Slin *Spirosoma linguale* DSM 74 ZP\_04492490; SoneMR-1 *Shewanella oneidensis* MR-1 NP\_717701; SoneMR-4 *Shewanella* sp. MR-4 YP\_733952; SoneMR-7 *Shewanella* sp. MR-7 YP\_738201; Sros *Streptosporangium roseum* DSM 43021 ZP\_04474993; Sste37 *Sagittula stellata* E-37 ZP\_01748533; Ssvi *Streptomyces svicensis* ATCC 29083 YP\_002204206; Susi *Solibacter usitatus* Ellin6076 YP\_827763; Svir *Saccharomonospora viridis* DSM 43017 ZP\_04507584; TcarNor1 *Thermosinus carboxydivorans* Nor1 ZP\_01667576; Tden25259 *Thiobacillus denitrificans* ATCC 25259 YP\_315133; Tden33889 *Sulfurimonas denitrificans* DSM 1251 YP\_393947; Tery *Trichodesmium erythraeum* IMS101 YP\_722943; TM1035-Sens *Roseovarius* sp. TM1035 ZP\_01881113; Tros 5159 *Thermomicrobium roseum* DSM 5159 YP\_002523076; Tros2 *Thiocapsa roseopersicina* AAA27410; Tros *Thiocapsa roseopersicina* AAC38282; Ucyn-A *Cyanothece* sp. CCY 0110 ZP\_01728928; VangS14 *Vibrio angustum* S14 ZP\_01234606; Wsuc1740 *Wolinella succinogenes* DSM 1740 NP\_907813; Yent8081 *Yersinia enterocolitica* subsp. enterocolitica 8081 YP\_001007767. The sequence of the marine unicellular group A cyanobacteria has been generated from the available short reads [70].

Found at: doi:10.1371/journal.pone.0013846.s005 (0.67 MB DOC)

**Figure S5** Distribution of small subunits of the bidirectional NAD(P)+ linked hydrogenase found in the GOS database of the different prokaryotic groups. The small subunit gene, *hoxY*, of *Synechocystis* has been used for the search. All genes have been retrieved from Punta Comorant, a hypersaline pond on the Galapagos Islands.

Found at: doi:10.1371/journal.pone.0013846.s006 (0.06 MB DOC)

**Figure S6** Distribution of small subunits of the membrane bound H<sub>2</sub> uptake hydrogenases found in the GOS database of the different prokaryotic groups. The *hupS* sequence of *Desulfovibrio vulgaris* was used for the search. On the right the number of sequences from the different sampling stations is shown.

Found at: doi:10.1371/journal.pone.0013846.s007 (0.08 MB DOC)

**Figure S7** Distribution of small subunits of the cyanobacterial-like uptake hydrogenase found in the GOS database of the different prokaryotic groups. The small subunit gene, *hupS*, of *Nostoc* sp. PCC 7120 has been used for the search.



Found at: doi:10.1371/journal.pone.0013846.s008 (0.05 MB DOC)

**Figure S8** Phylogenetic tree of HoxH sequences. Representatives of the 49 kDa subunit of the complex I have been used as outgroup. The used abbreviations and their respective accession numbers are as follows: Afla *Acetomicrobium flavidum* CAA56464; Ahalo *Aphanothce halophytica* GQ454444; Amar *A Caryochloris marina* MBIC11017 YP\_001521996; Amax *Arthrospira maxima* FACHBSM AAQ63961; Apla1 *Arthrospira platensis* FACHB341 AAQ63964; Apla2 *Arthrospira platensis* FACHBOUQDS6 AAQ63959; Apla3 *Arthrospira platensis* FACHB439 AAQ63960; Apla4 *Arthrospira platensis* FACHB791 AAQ91344; Avar *Anabaena variabilis* ATCC 29413 YP\_325153; Bxen *Burkholderia xenovorans* LB400 YP\_555781; Cagg *Chloroflexus aggregans* DSM 9485 YP\_002463784; CaggL *Chlorobium chlorochromatii* CaD3 YP\_378564; Caur *Chloroflexus aurantiacus* J-10-fl YP\_001634807; CCY0110 *Cyanothece* sp. CCY 0110 ZP\_01727423; ClimL *Chlorobium limicola* DSM 245 YP\_001944104; Cnec *Ralstonia eutropha* H16 NP\_942730; CphaL *Chlorobium phaeobacteroides* DSM 266 YP\_912598; CtepL *Chlorobium tepidum* TLS NP\_662771; Daro *Dechloromonas aromatica* RCB YP\_284208; DethV *Dehalococcoides ethenogenes* 195 YP\_181357; Dpsy *Desulfotalea psychrophila* LSV54 YP\_065948; DpsyV *Desulfotalea psychrophila* LSV54 YP\_064749; Ecol *Escherichia coli* CAA48363; Galp *Gloeocapsa alpica* str. CALU 743 AAO85440; Gmet1 *Geobacter metallireducens* GS-15 YP\_384078; Gmet2 *Geobacter metallireducens* GS-15 YP\_386258; GOS1 and GOS2 are the two consensus sequences retrieved from the GOS database; Gsul1 *Geobacter sulfurreducens* PCA NP\_953465; Gsul2 *Geobacter sulfurreducens* PCA NP\_953763; Lyng *Lyngbya majuscula* CCAP 1446/4 AAT07678; Magneto *Magnetococcus* sp. MC-1 YP\_864809; Mastigo *Mastigocladus laminosus* SAG 4.84 GQ454445; Mcap *Methylococcus capsulatus* str. Bath YP\_112653; MferV *Methanothermobacter fervidus* Q49179; MjanV *Methanocaldococcus jannaschii* DSM 2661 NP\_248187; Mkan *Methanopyrus kandleri* AV19 NP\_613553; Mmag *Magnetospirillum magnetotacticum* MS-1 ZP\_00053777; MmarV *Methanococcus maripaludis* S2 NP\_987943; MvolV1 *Methanococcus voltae* Q00404; MvolV2 *Methanococcus voltae* Q00407; N7120 *Nostoc* sp. PCC 7120

NP\_484809; N7422 *Nostoc* sp. PCC 7422 BAE46796; Neptuni *Oceanospirillum* sp. MED92 ZP\_01164927; Nitrococcus *Nitrococcus mobilis* Nb-231 ZP\_01126922; Nspu *Nodularia spumigena* CCY 9414 ZP\_01629499; Nspu *Nodularia spumigena* CCY 9414 ZP\_01629499; PaesL *Prosthecochloris aestuarii* DSM 271 YP\_002016588; PflurL1 *Pyrococcus furiosus* DSM 3638 NP\_578623; PflurL2 *Pyrococcus furiosus* DSM 3638 NP\_579061; Phol *Prochlorothrix hollandica* AAB53705; Plancto *Planctomyces maris* DSM 8797 ZP\_01852867; PMED4 *Prochlorococcus marinus* subsp. *pastoris* str. CCMP1986 NP\_892293; PphaL *Pelodictyon phaeoclathratiforme* BU-1 YP\_002019299; Rcas *Roseiflexus castenholzii* DSM 13941 YP\_001431482; Rmet *Ralstonia metallidurans* CH34 YP\_583677; Ropa *Rhodococcus opacus* AAB57892; RRS-1 *Roseiflexus* sp. RS-1 YP\_001277847; S6301 *Synechococcus elongatus* PCC 6301 YP\_172265; S6803 *Synechocystis* sp. PCC 6803 NP\_441259; S6803 *Synechocystis* sp. PCC 6803 NP\_441411; S7002 *Synechococcus* sp. PCC 7002 YP\_001733469; S7942 *Synechococcus elongatus* PCC 7942 YP\_401572; Spla *Arthrospira platensis* FACHB440 AAQ63963; Ssub *Spirulina subsalsa* FACHB351 AAQ63962; Susi *Solibacter usitatus* Ellin6076 YP\_826256; Tros *Thiocapsa roseopersicina* AAP50523; WH5701 *Synechococcus* sp. WH 5701 ZP\_01085930.

Found at: doi:10.1371/journal.pone.0013846.s009 (0.13 MB DOC)

## Acknowledgments

We are thankful for the help from the crews on the research vessels Polarfuchs (Institut für Meereskunde, Kiel) and the captain Uwe Becker of the Südfall and Andreas Ruser from FTZ (Büsum) and Christoph Keller and Conny Schmidt and Fischerei Reese while taking samples on Selenter See. Special thanks are to Jonathan Zehr and Jim Tripp for providing sequence reads of the unicellular  $N_2$ -fixing cyanobacteria in "group A".

## Author Contributions

Conceived and designed the experiments: RS JL RS JA. Performed the experiments: MB CB TS FG FO CM. Analyzed the data: MB CB TS FG FO CM CS KG JA. Contributed reagents/materials/analysis tools: KHV RS JL RS. Wrote the paper: JA.

## References

- Novelli PC, Lang PM, Masarie KA, Hurst DF, Myers R, Elkins JW (1999) Molecular hydrogen in the troposphere: global distribution and budget. *J Geophys Res* 104: 30427–30444.
- Ehhalt DH, Rohrer F (2009) The tropospheric cycle of  $H_2$ : a critical review. *Tellus* 61B: 500–535.
- Price H, Jaegle L, Rice A, Quay P, Novelli PC, et al. (2007) Global budget of molecular hydrogen and its deuterium content: Constraints from ground station, cruise, and aircraft observations. *J Geophys Res Atmospheres* 112: D22108.
- Conrad R, Seiler W (1980) Contribution of hydrogen production by biological nitrogen fixation to the global hydrogen budget. *J Geophys. Res* 85: 5493–5498.
- Rhan T, Eiler JM, Boering KA, Wennberg PO, McCarthy MC, et al. (2003) Extreme deuterium enrichment in the stratospheric hydrogen and the global atmospheric budget of  $H_2$ . *Nature* 424: 918–921.
- Conrad R (1996) Soil microorganisms as controllers of atmospheric trace gases ( $H_2$ , CO,  $CH_4$ , OCS,  $N_2O$ , and NO). *Mol Microbiol Rev* 60: 609–640.
- Scranton MI, Jones MM, Herr FL (1982) Distribution and variability of dissolved hydrogen in the Mediterranean Sea. *J Mar Res* 40: 873–891.
- Herr FL, Frank EC, Leone GM, Kennicutt MC (1984) Diurnal variability of dissolved molecular hydrogen in the tropical South Atlantic ocean. *Deep Sea Res* 31: 13–20.
- Conrad R, Seiler W (1988) Methane and hydrogen in seawater (Atlantic Ocean). *Deep Sea Res* 35: 1903–1917.
- Herr FL, Scranton MI, Barger WR (1981) Dissolved hydrogen in the Norwegian sea: mesoscale surface variability and deep water distribution. *Deep Sea Res* 28: 1001–1016.
- Punshon S, Moore RM, Xie H (2007) Net loss rates and distribution of molecular hydrogen ( $H_2$ ) in mid-latitude coastal waters. *Mar Chem* 105: 129–139.
- Schmidt U, Conrad R (1993) Hydrogen, carbon monoxide, and methane dynamics in Lake Constance. *Limnol Oceanogr* 38: 1214–1226.
- Conrad R, Aragno M, Seiler W (1983) Production and consumption of hydrogen in a eutrophic lake. *Appl Environ Microbiol* 45: 502–510.
- Schütz H, Conrad R, Goodwin S, Seiler W (1988) Emission of hydrogen from deep and shallow freshwater environments. *Biogeochem* 5: 295–311.
- Lindberg P, Lindblad P, Cournac L (2004) Gas exchange in the filamentous cyanobacterium *Nostoc punctiforme* strain ATCC 29133 and its hydrogenase-deficient mutant strain NHM5. *Appl Environ Microbiol* 70: 2137–2145.
- Scranton MI, Novelli PC, Michaels A, Horrigan SG, Carpenter EJ (1987) Hydrogen production and nitrogen fixation by *Oscillatoria thiebautii* during in situ incubations. *Limnol Oceanogr* 32: 998–1006.
- Punshon S, Moore RM (2008) Photochemical production of molecular hydrogen in lake water and coastal seawater. *Mar Chem* 108: 215–220.
- Schwartz E, Friedrich B (2005) The  $H_2$ -metabolising prokaryotes. In: Dworkin M, Falkow S, eds. *A Handbook of the Biology of Bacteria: Ecophysiology and Biochemistry* 2: 496–563.
- Vignais PM, Billoud B (2007) Occurrence, classification and biological function of hydrogenases: an overview. *Chem Rev* 107: 4206–4272.
- Vignais PM, Billoud B, Meyer J (2001) Classification and phylogeny of hydrogenases. *FEMS Microbiol Rev* 25: 455–501.
- Burgdorf T, Lenz O, Buhrke T, van der Linden E, Jones AK, Albracht SPJ, Friedrich B (2005) [NiFe]-hydrogenases of *Ralstonia eutropha* H16: Modular

- enzymes for oxygen-tolerant biological hydrogen oxidation. *J Mol Microbiol Biotech* 10: 181–196.
22. Ballantine SP, Boxer DH (1986) Isolation and characterization of a soluble active fragment of hydrogenase isoenzyme 2 from the membranes of anaerobically grown *Escherichia coli*. *Eur J Biochem* 156: 277–284.
  23. Lukey MJ, Parkin A, Roessler MM, Murphy BJ, Harmer J, et al. (2010) How *Escherichia coli* is equipped to oxidize hydrogen under different redox conditions. *J Biol. Chem* 285: 3928–3938.
  24. Sawers RG (2005) Formate and its role in hydrogen production in *Escherichia coli*. *Biochem Soc Trans* 33: 42–46.
  25. Hedderich R, Forzi L (2005) Energy-converting [NiFe] hydrogenases: more than just H<sub>2</sub> activation. *J Mol. Microbiol. Biotechnol* 10: 92–104.
  26. Ng G, Tom CG, Park AS, Zenad L, Ludwig RA (2009) A novel endo-hydrogenase activity recycles hydrogen produced by nitrogen fixation. *PLoS One* 3: e4695.
  27. Lechner S, Conrad R (1997) Detection in soil of aerobic hydrogen-oxidizing bacteria related to *Alcaligenes eutrophus* by PCR and hybridization assays targeting the gene of the membrane bound (NiFe) hydrogenase. *FEMS Microbiol. Ecol* 22: 193–206.
  28. Constant P, Chowdhury SP, Pratscher J, Conrad R (2010) *Streptomyces* contributing to atmospheric molecular hydrogen soil uptake are widespread and encode a putative high-affinity [NiFe]-hydrogenase. *Environ Microbiol* 12: 821–829.
  29. Boyd ES, Spear JR, Peters JW (2009) [FeFe] hydrogenase genetic diversity provides insight into molecular adaptation in a saline microbial mat community. *Appl. Environ. Microbiol* 75: 4620–4623.
  30. Boyd ES, Hamilton TL, Spear JR, Lavin M, Peters JW (2010) [FeFe]-hydrogenase in Yellowstone National Park: evidence for dispersal limitation and phylogenetic niche conservatism. *ISME J* 2010 Jun 10 [Epub ahead of print] 10.
  31. Cummings L, Riley L, Black L, Souvorov A, Resenchuk S, et al. (2002) Genomic BLAST: custom-defined virtual databases for complete and unfinished genomes. *FEMS Microbiol Lett* 216: 133–138.
  32. Venter JC, Remington K, Heidelberg JF, Halpern AL, Rusch D, et al. (2004) Environmental genome shotgun sequencing of the Sargasso Sea. *Science* 304: 66–74.
  33. Rusch DB, Halpern AL, Sutton G, Heidelberg KB, Williamson S, et al. (2007) The Sorcerer II Global Ocean Sampling expedition: Northwest Atlantic through eastern tropical Pacific. *PLoS Biol* 5(3): e77. doi:10.1371/journal.pbio.0050077.
  34. Yooshep S, Sutton G, Rusch DB, Halpern AL, Williamson SJ, et al. (2007) The Sorcerer II Global Ocean Sampling expedition: Expanding the universe of protein families. *PLoS Biol* 5: e16. doi:10.1371/journal.pbio.0050016.
  35. Appel J, Schulz R (1998) Hydrogen metabolism in organisms with oxygenic photosynthesis - hydrogenases as important regulatory devices for a proper redox poising? *J Photochem Photobiol B: Biol* 47: 1–11.
  36. Tamagnini P, Leitao E, Oliveira P, Ferreira D, Pinto F, Harris DJ, Heidorn TT, Lindblad P (2008) Cyanobacterial hydrogenases: diversity, regulation and applications. *FEMS Microbiol Rev* 31: 692–720.
  37. Ludwig M, Schulz-Friedrich R, Appel J (2006) Occurrence of hydrogenases in cyanobacteria and anoxygenic photosynthetic bacteria: implications for the phylogenetic origin of cyanobacterial and algal hydrogenases. *J Mol Evol* 63: 758–768.
  38. Altschul SF, Madden TL, Schaffer AA, Zhang J, Zhang Z, et al. (1997) Gapped BLAST and PSI-BLAST: a new generation of protein database search programs. *Nucleic Acids Res* 25: 3389–3402.
  39. Gutekunst K, Hoffmann D, Lommer M, Egert M, Suzuki I, et al. (2006) Metal dependence and intracellular regulation of the bidirectional NiFe-hydrogenase in *Synechocystis* sp PCC 6803. *Int J Hydr. Energ* 31: 1452–1459.
  40. Tripp HJ, Bench SR, Turk KA, Foster RA, Desany BA, Niazi F, Affourtit JP, Zehr JP (2010) Metabolic streamlining in an open-ocean nitrogen-fixing cyanobacterium. *Nature* 464: 90–94.
  41. Fontecilla-Camps JC, Volbeda A, Cavazza C, Nicolet Y (2007) Structure/function relationship of [NiFe]- and [FeFe]-hydrogenases. *Chem Rev* 107: 4273–4303.
  42. Sorokin YI (2002) *The Black Sea: Ecology and Oceanography*, Backhuys Publishers, Leiden, The Netherlands.
  43. Lenz O, Friedrich B (1998) A novel multicomponent regulatory system mediates H<sub>2</sub> sensing in *Alcaligenes eutrophus*. *Proc Natl Acad Sci USA* 95: 12474–12479.
  44. Elsen S, Duché O, Colbeau A (2003) Interaction between the H<sub>2</sub> sensor HupUV and the histidine kinase HupT controls HupSL hydrogenase synthesis in *Rhodobacter capsulatus*. *J Bacteriol* 185: 7111–7119.
  45. Buhke T, Lenz O, Porthun A, Friedrich B (2004) The H<sub>2</sub>-sensing complex of *Ralstonia eutropha*: interaction between a regulatory [NiFe] hydrogenase and a histidine protein kinase. *Mol Microbiol* 51: 1677–1689.
  46. Vignais PM, Elsen S, Colbeau A (2005) Transcriptional regulation of the uptake [NiFe] hydrogenase genes in *Rhodobacter capsulatus*. *Biochem Soc Trans* 33: 28–32.
  47. Bernhard M, Schwartz E, Rietdorf J, Friedrich B (1996) The *Alcaligenes eutrophus* membrane-bound hydrogenase gene locus encodes functions involved in maturation and electron transport coupling. *J Bacteriol* 178: 4522–4529.
  48. Ludwig M, Schubert T, Zebger I, Wisitruangsakul N, Saggiu M, et al. (2009) Concerted action of two novel auxiliary proteins in assembly of the active site in a membrane-bound [NiFe]-hydrogenase. *J Biol Chem* 284: 2159–2168.
  49. Redwood MD, Mikheenko IP, Sargent F, Macaskie LE (2008) Dissecting the roles of *Escherichia coli* hydrogenases in biohydrogen production. *FEMS Microbiol Lett* 278: 48–55.
  50. Arahal DR, Lekunberri I, Gonzalez JM, Pascual J, Pujalte MJ, Pedros-Alio C, Pinhassi J (2007) *Neptuniibacter caesiariensis* gen. nov., sp. nov., a novel genome-sequenced gamma proteobacterium. *Int J Syst Evol Microbiol* 57: 1000–1006.
  51. Buhke T, Friedrich B (1998) hoxX (hypX) is a functional member of the *Alcaligenes eutrophus* hyp gene cluster. *Arch Microbiol* 170: 460–463.
  52. Whitman WB, Coleman DC, Wiebe WJ (1998) Prokaryotes: The unseen majority. *Proc Natl Acad Sci USA* 95: 6578–6583.
  53. Giovannoni SJ, Stingl U (2005) Molecular diversity and ecology of microbial plankton. *Nature* 437: 343–348.
  54. Pedros-Alio C (2006) Marine microbial diversity: can it be determined? *Trends Microbiol* 14: 257–263.
  55. DeLong EF (2005) Microbial community genomics in the ocean. *Nat Rev Microbiol* 3: 459–469.
  56. Yutin N, Suzuki MT, Teeling H, Weber M, Venter JC, Rusch DB, Beja O (2007) Assessing diversity and biogeography of aerobic anoxygenic phototrophic bacteria in surface waters of the Atlantic and Pacific oceans using the global ocean sampling expedition metagenomes. *Environ Microbiol* 9: 1464–1475.
  57. Poretsky RS, Hewson I, Sun S, Allen AE, Zehr JP, Moran MA (2009) Comparative day/night metatranscriptomic analysis of microbial communities in the North Pacific subtropical gyre. *Environ Microbiol* 11: 1358–1375.
  58. Appel J, Schulz R (1996) Sequence analysis of an operon of a NAD(P)-reducing nickel hydrogenase from the cyanobacterium *Synechocystis* sp. PCC 6803 gives additional evidence for direct coupling of the enzyme to NAD(P)H-dehydrogenase (complex I). *Biochim Biophys Acta* 1298: 141–147.
  59. Schmitz O, Bothé H (1996) The diaphorase subunit HoxU of the bidirectional hydrogenase as electron transferring protein in cyanobacterial respiration? *Naturwissenschaften* 83: 525–527.
  60. Troshina O, Serebryakova L, Shermetieva M, Lindblad P (2002) Production of H<sub>2</sub> by the unicellular cyanobacterium *Gloeocapsa alpicola* CALU 743 during fermentation. *Int J Hydr Energ* 27: 1283–1289.
  61. Appel J, Phunpruch S, Steinmüller K, Schulz R (2000) The bidirectional hydrogenase of *Synechocystis* sp. PCC 6803 works as an electron valve during photosynthesis. *Arch Microbiol* 173: 333–338.
  62. Cournac L, Mus F, Bernard L, Guedeny G, Vignais PM, Peltier G (2002) Limiting steps of hydrogen production in *Chlamydomonas reinhardtii* and *Synechocystis* PCC 6803 as analysed by light-induced gas exchange transients. *Int J Hydrog Energy* 27: 1229–1237.
  63. Cournac L, Guedeny G, Peltier G, Vignais PM (2004) Sustained photoevolution of molecular hydrogen in a mutant of *Synechocystis* sp. Strain PCC 6803 deficient in the type I NADPH-dehydrogenase complex, *J Bacteriol* 186: 1737–1746.
  64. Gutthann F, Egert M, Marques A, Appel J (2007) Inhibition of respiration and nitrate assimilation enhances hydrogen evolution in *Synechocystis* sp. PCC 6803. *Biochem Biophys Acta* 1767: 161–169.
  65. Hoehler TM, Bebout BM, DesMarais DJ (2001) The role of microbial mats in the production of reduced gases on the early Earth. *Nature* 412: 324–327.
  66. Vincent KA, Cracknell JA, Clark JR, Ludwig M, Lenz O, et al. (2006) electricity from low-level H<sub>2</sub> in still air – an ultimate test for an oxygen tolerant hydrogenase. *Chem Comm.* pp 5033–5035.
  67. Cracknell JA, Vincent KA, Ludwig M, Lenz O, Friedrich B, Armstrong FA (2008) Enzymatic oxidation of H<sub>2</sub> in atmospheric O<sub>2</sub>: the electrochemistry of energy generation from trace H<sub>2</sub> by aerobic microorganisms. *J Am Chem Soc* 130: 424–425.
  68. Gonzalez JM, Moran MA (1997) Numerical dominance of a group of marine bacteria in the  $\alpha$ -subclass of the class *proteobacteria* in coastal seawater. *Appl Environ Microbiol* 63: 4237–4242.
  69. King GM (2003) Uptake of carbon monoxide and hydrogen at environmentally relevant concentrations by mycobacteria. *Appl Environ Microbiol* 69: 7266–7272.
  70. Morita RY (2000) Is H<sub>2</sub> the universal energy source for long-term survival? *Microb Ecol* 38: 307–320.
  71. King GM, Weber CF (2007) Distribution, diversity and ecology of aerobic CO<sub>2</sub>-oxidizing bacteria. *Nat Rev Microbiol* 5: 107–117.
  72. Moran MA, Miller WL (2007) Resourceful heterotrophs make the most of light in the coastal ocean. *Nat Rev Microbiol* 5: 792–800.
  73. Ploug H, Kuhl M, Buchholz-Cleven B, Jørgensen BB (1997) Anoxic aggregates - an ephemeral phenomenon in the pelagic environment? *Aquatic Micro Ecol* 13: 285–294.
  74. Maróti G, Tong Y, Yooshep S, Baden-Tillson H, Smith HO, et al. (2009) Discovery of [NiFe] hydrogenase genes in metagenomic DNA: cloning and heterologous expression in *Thiocapsa roseopersicina*. *Appl. Environ. Microbiol* 75: 5821–5830.
  75. Iars-Martinez E, Martin-Cuadrado AB, D'Auria G, Mira A, Ferriera S, Johnson J, Friedman R, Rodriguez-alera F (2008) Comparative genomics of two ecotypes of the marine planktonic copiotroph *Alteromonas macleodii* suggests alternative lifestyles associated with different kinds of particulate organic matter. *ISME J* 2: 1194–1212.
  76. Mitsui A, Suda S (1995) Alternative and cyclic appearance of H<sub>2</sub> and O<sub>2</sub> photoproduction activities under nongrowing conditions in an aerobic nitrogen fixing unicellular cyanobacterium *Synechococcus* sp. *Curr Microbiol* 30: 1–6.
  77. Ortégacalvo JJ, Stal LJ (1991) Diazotrophic growth of the unicellular cyanobacterium *Gloeotheca* sp. PCC 6909 in continuous culture. *J Gen Microbiol* 137: 1789–1797.

78. Zehr JP, Waterbury JB, Turner PJ, Montoya JP, Omoregie E, et al. (2001) Unicellular cyanobacteria fix N<sub>2</sub> in the subtropical North Pacific Ocean. *Nature* 412: 635–638.
79. Montoya JP, Holl CM, Zehr JP, Hansen A, Villareal TA, et al. (2004) High rates of N<sub>2</sub> fixation by unicellular diazotrophs in the oligotrophic Pacific Ocean. *Nature* 430: 1027–1031.
80. Zehr JP, Bench SR, Carter BJ, Hewson I, Niazi F, et al. (2008) Globally distributed uncultivated oceanic N<sub>2</sub>-fixing cyanobacteria lack oxygenic photosystem II. *Science* 322: 1110–1112.
81. Langlois RJ, Hummer D, LaRoche J (2008) Abundances and Distributions of the Dominant *nifH* Phylotypes in the Northern Atlantic Ocean. *Appl Environ Microbiol* 74: 1922–1931.
82. Fong AA, Karl DM, Lukas R, Letelier RM, Zehr JP, et al. (2008) Nitrogen fixation in an anticyclonic eddy in the oligotrophic North Pacific Ocean. *ISME J* 2: 663–76.
83. Paulmier A, Ruiz-Pino D (2009) Oxygen minimum zones (OMZs) in the modern ocean. *Prog Oceanogr* 80: 113–128.
84. Thompson JD, Higgins DG, Gibson TJ (1994) CLUSTAL W: improving the sensitivity of progressive multiple sequence alignment through sequence weighting, position-specific gap penalties and weight matrix choice. *Nucleic Acids Res* 22: 4673–4680.
85. Felsenstein J (2005) PHYLIP (Phylogeny Inference Package), version 3.6, Distributed by the author, Department of Genome, Sciences, University of Washington, Seattle.
86. Fitch WM, Margoliash E (1967) Construction of phylogenetic trees. *Science* 155: 279–284.
